# Supplementary material for: The copper-catalyzed synthesis of (Z)-2H-naphtho[1,8-bc]thiophenes with solid emission
Source: Royal Society of Chemistry journal article supplement (doi:10.1039/d0ob02233k), 2021-01-01

# Supporting Information for

## Copper-Catalyzed Synthesis of (*Z*)-2*H*-naphtho[1,8-*bc*]thiophenes with solid emissions

Yuan Zhang <sup>a,1</sup>, Weiping Lai <sup>a,1</sup>, Lianpeng Zhang <sup>a,b,\*</sup>, Xiaoxing Gao <sup>a</sup>, Guanyinsheng Qiu <sup>a,\*</sup> and Hongwei Zhou <sup>a,\*</sup>

<sup>a</sup> College of Biological, Chemical Sciences and Engineering, Jiaying University, Jiaying 314001, Zhejiang, China

<sup>b</sup> School of Materials Science and Engineering, Southwest Forestry University, Kunming 650224, China

E-mail: lpz@zju.edu.cn; qiuguanyinsheng@mail.zjxu.edu.cn; zhouhw@zju.edu.cn

---

### Table of contents

|                                                                   |    |
|-------------------------------------------------------------------|----|
| 1. The photophysical properties of products                       | P2 |
| 2. Structures of <b>1a-1u</b> and <b>4a-4c</b>                    | P3 |
| 3. Structures of <b>3a-3w</b> , <b>5a-5c</b> and <b>6</b>         | P4 |
| 4. Control experiments                                            | P5 |
| 5. Copies of the Products <sup>1</sup> H NMR, <sup>13</sup> C NMR | P6 |

# 1. The photophysical properties of products

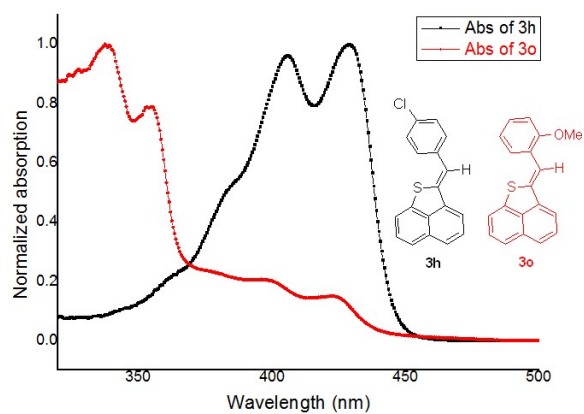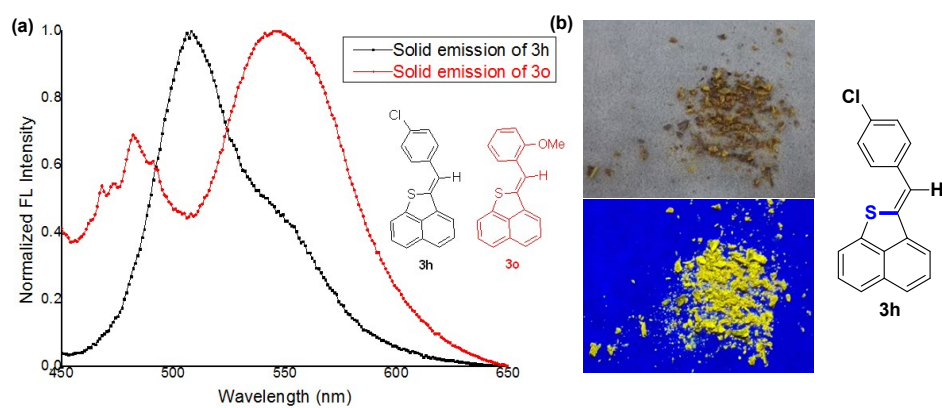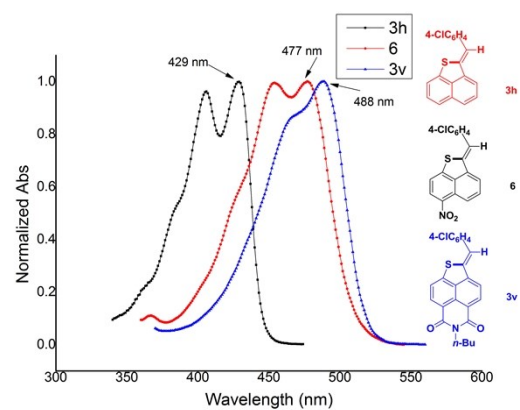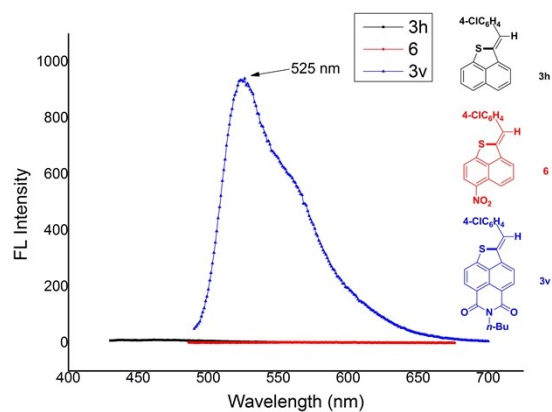

## 2. Structures of 1a-1u and 4a-4c

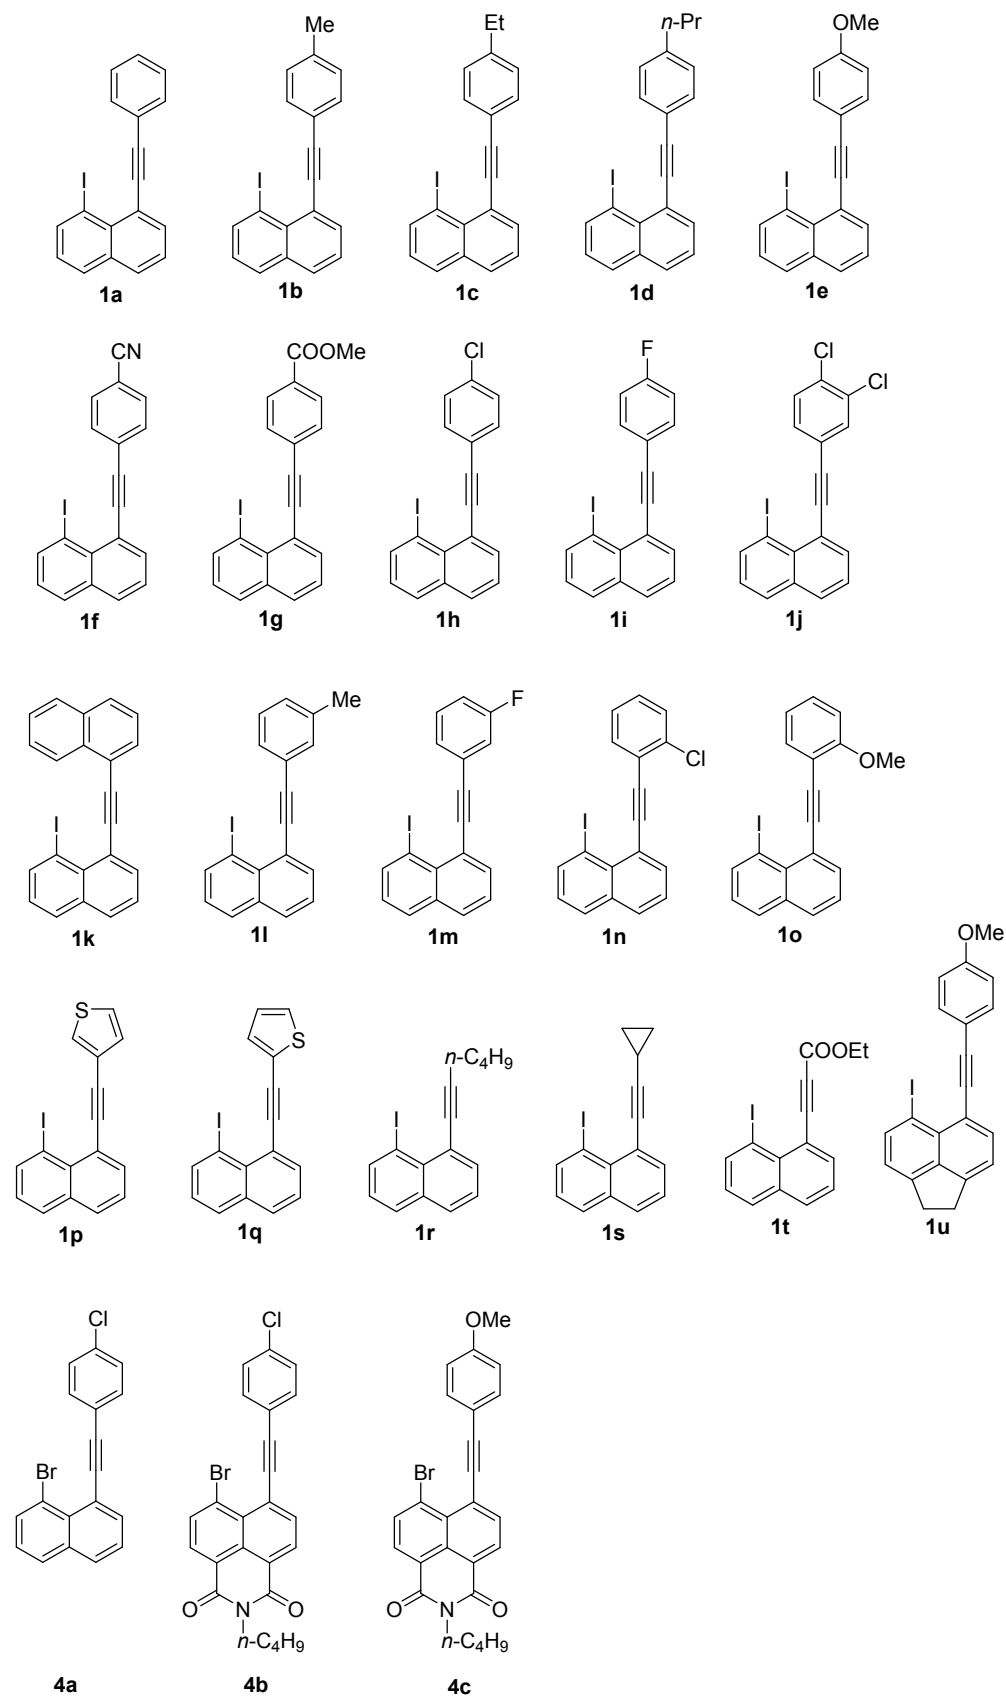

### 3. Structures of 3a-3w, 5a-5c and 6

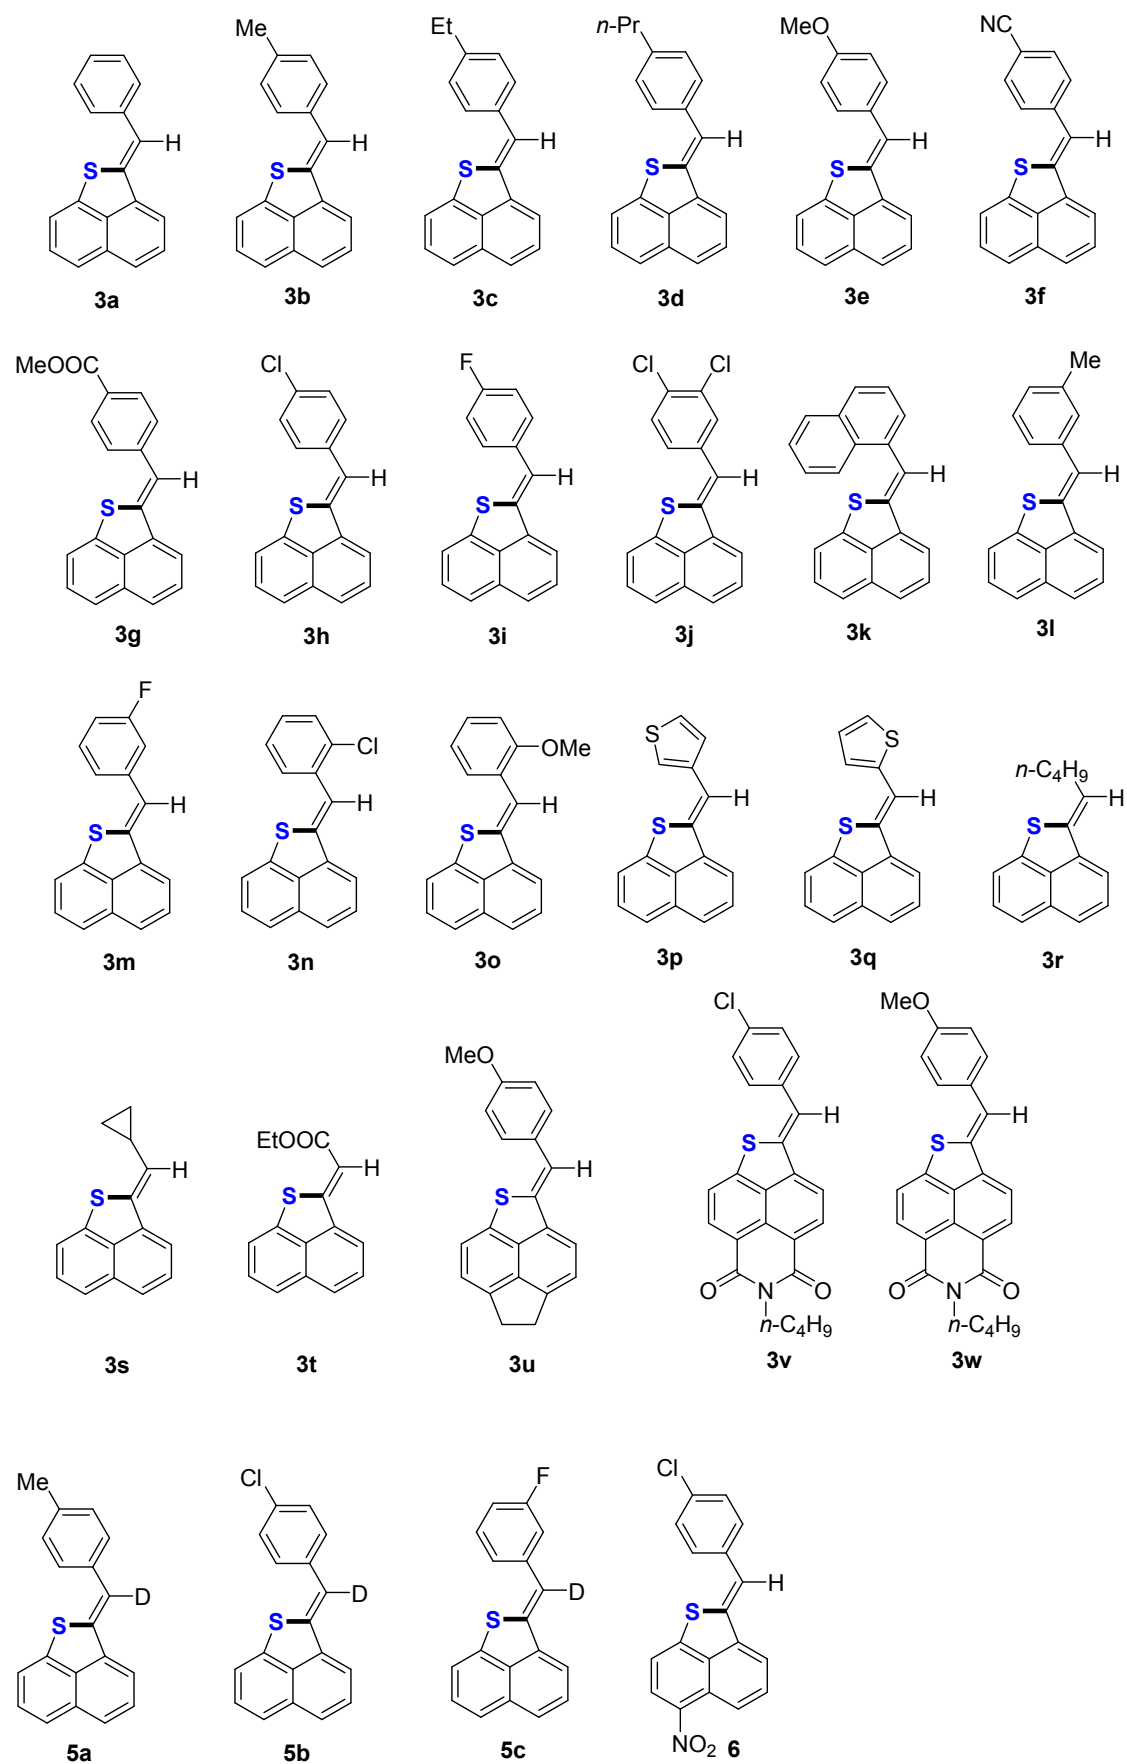

#### 4. Control experiments

**Table S1.** Using 1-((4-chlorophenyl)ethynyl)-8-iodonaphthalene as the substrate<sup>a</sup>

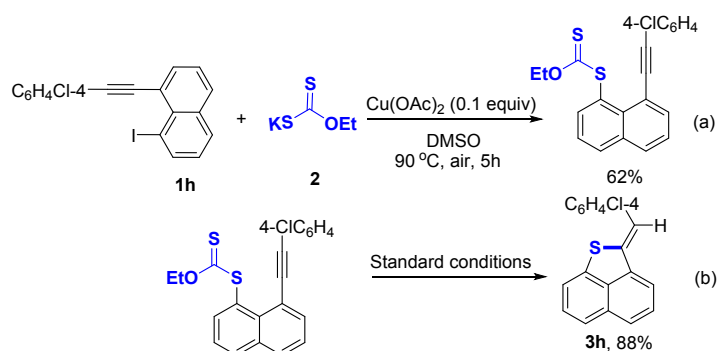

<sup>a</sup> Reaction conditions: **1h** (0.2 mmol) and  $\text{KSC}(\text{S})\text{OEt}$  (2.0 equiv, 64.1 mg) in 2 ml of DMSO was stirred under air.

## 5. Copies of the Products $^1\text{H}$ NMR, $^{13}\text{C}$ NMR

### (*Z*)-2-benzylidene-2*H*-naphtho[1,8-*bc*]thiophene (3a)

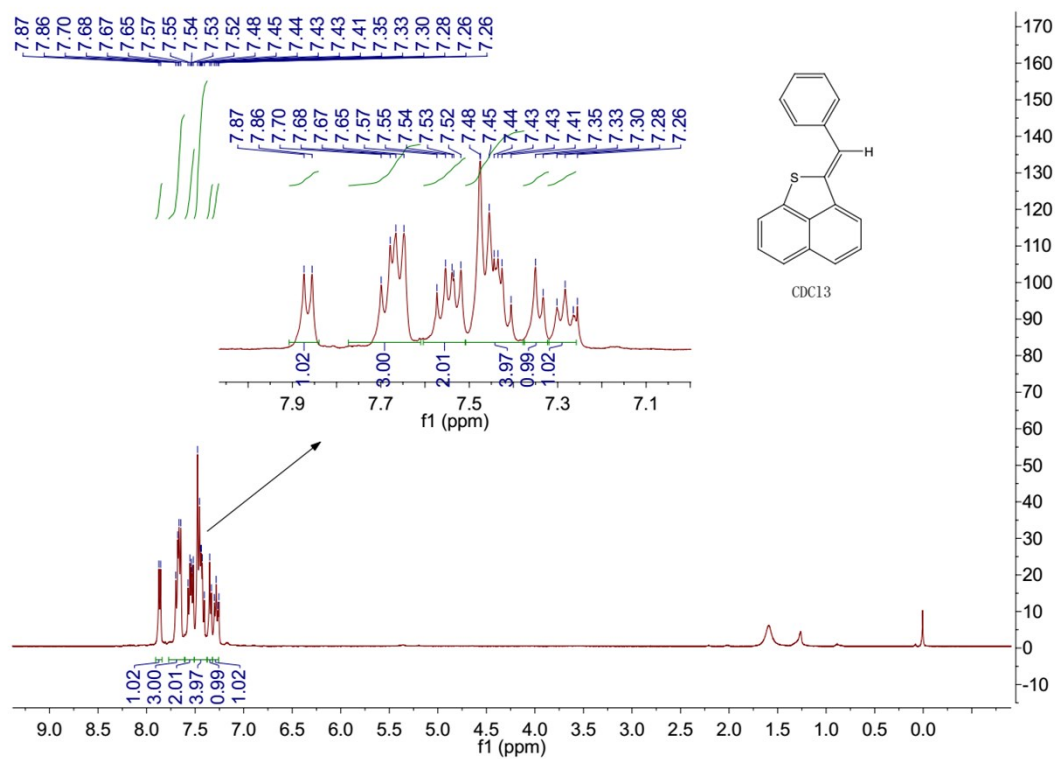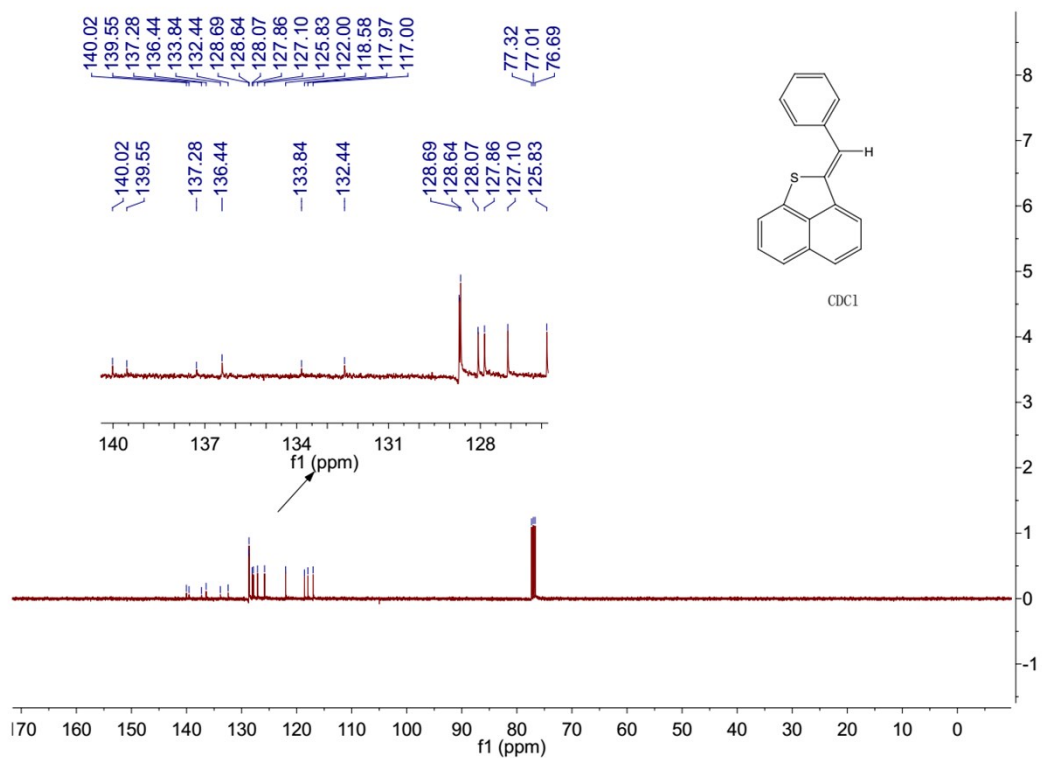

**(Z)-2-(4-methylbenzylidene)-2H-naphtho[1,8-bc]thiophene (3b)**

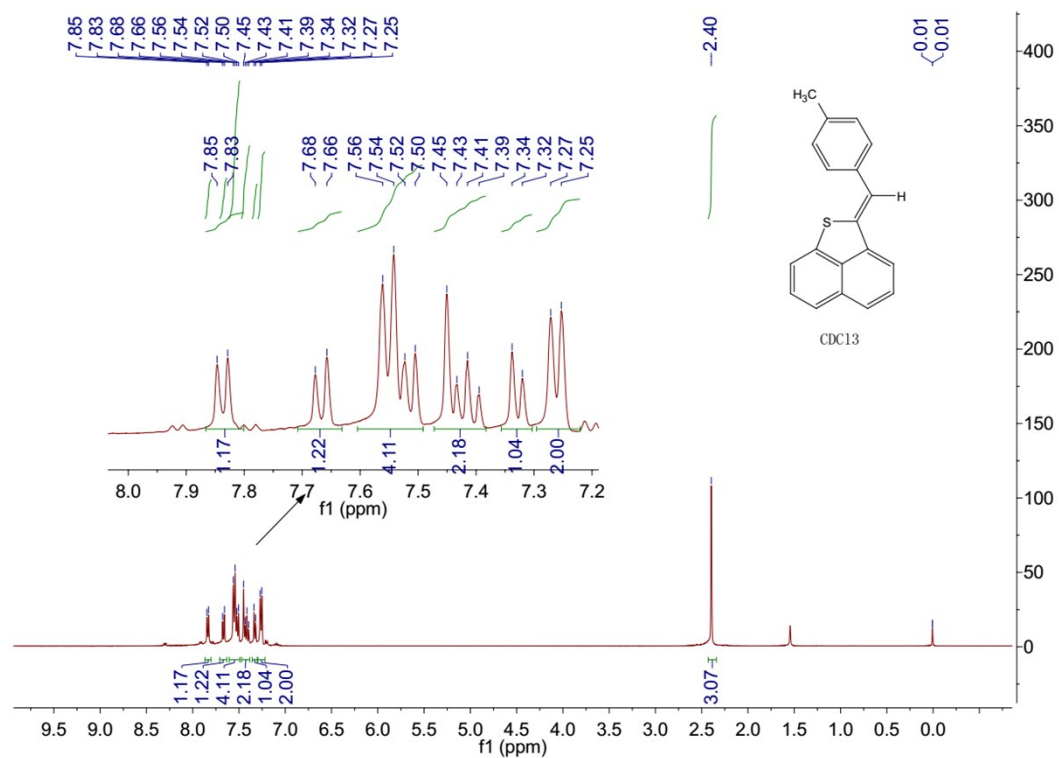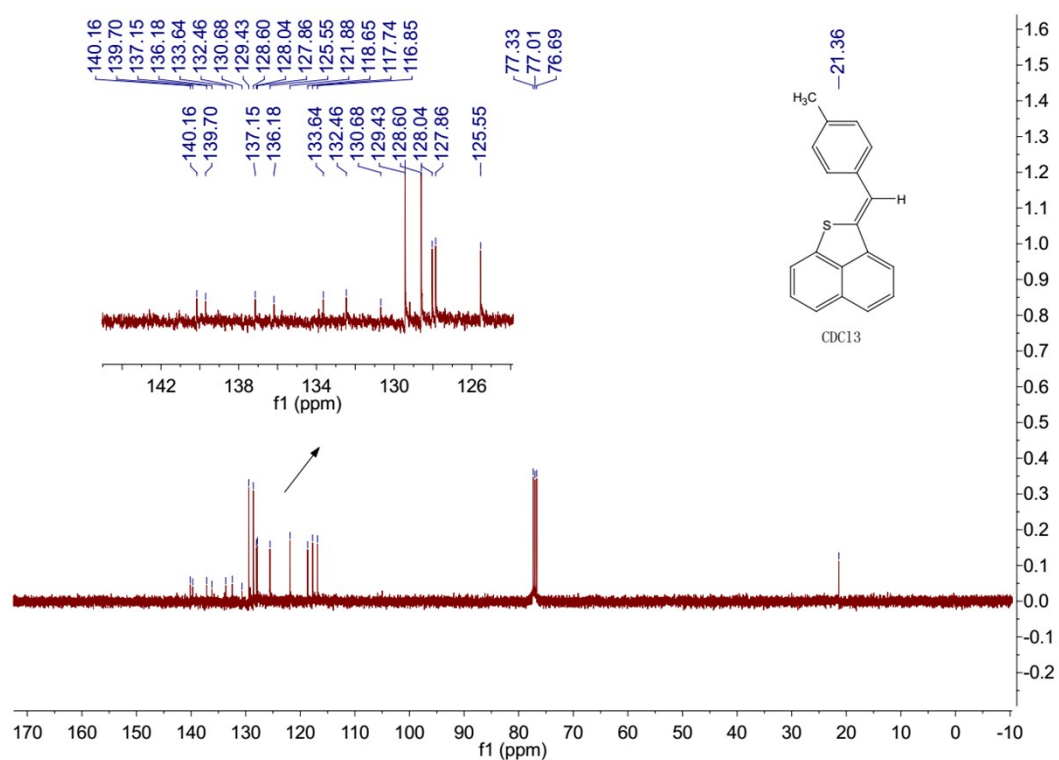

**(Z)-2-(4-ethylbenzylidene)-2H-naphtho[1,8-bc]thiophene (3c)**

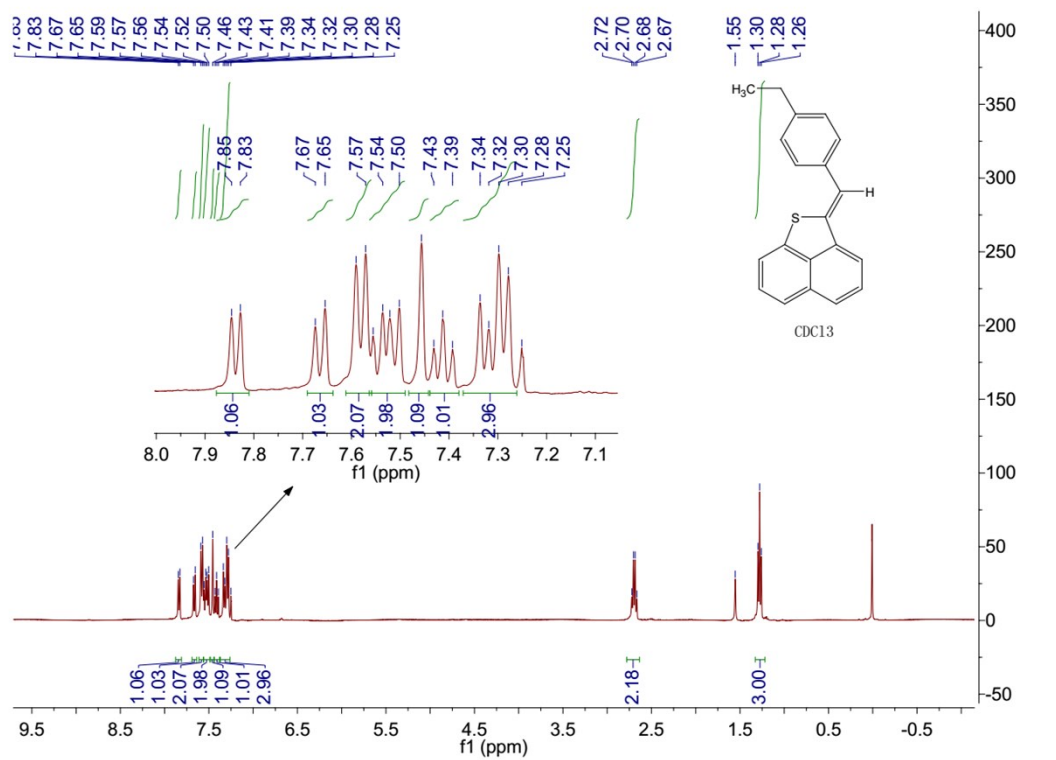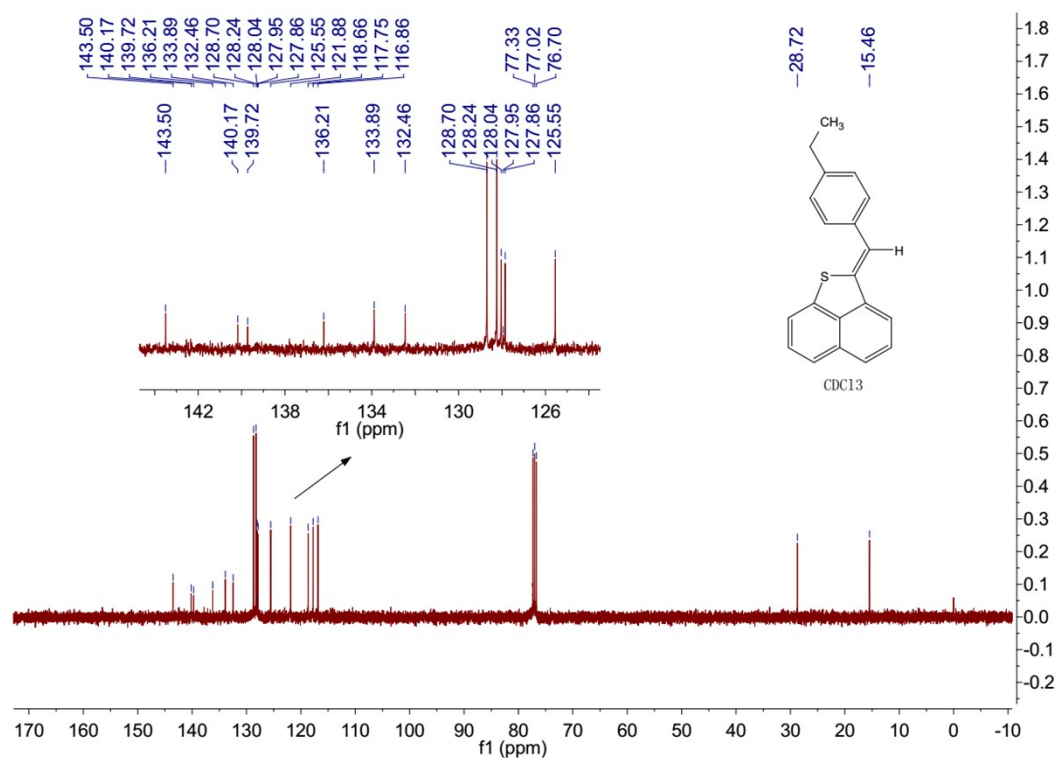



**(Z)-2-(4-propylbenzylidene)-2H-naphtho[1,8-bc]thiophene (3d)**

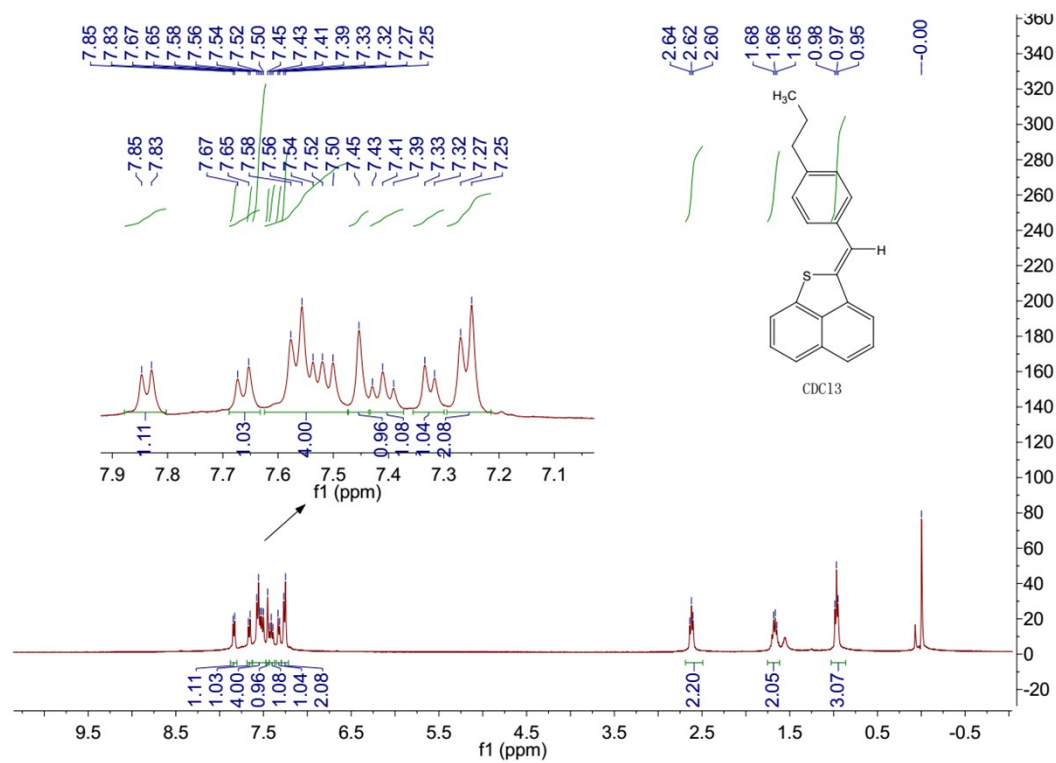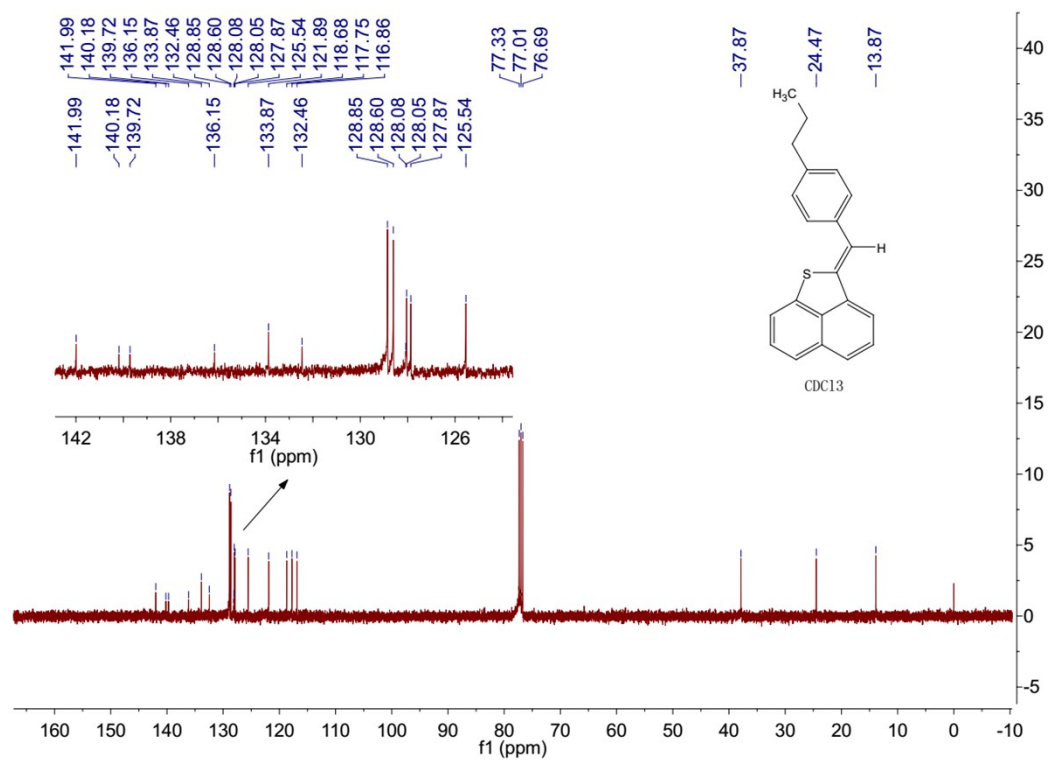

**(Z)-2-(4-methoxybenzylidene)-2H-naphtho[1,8-*bc*]thiophene (3e)**

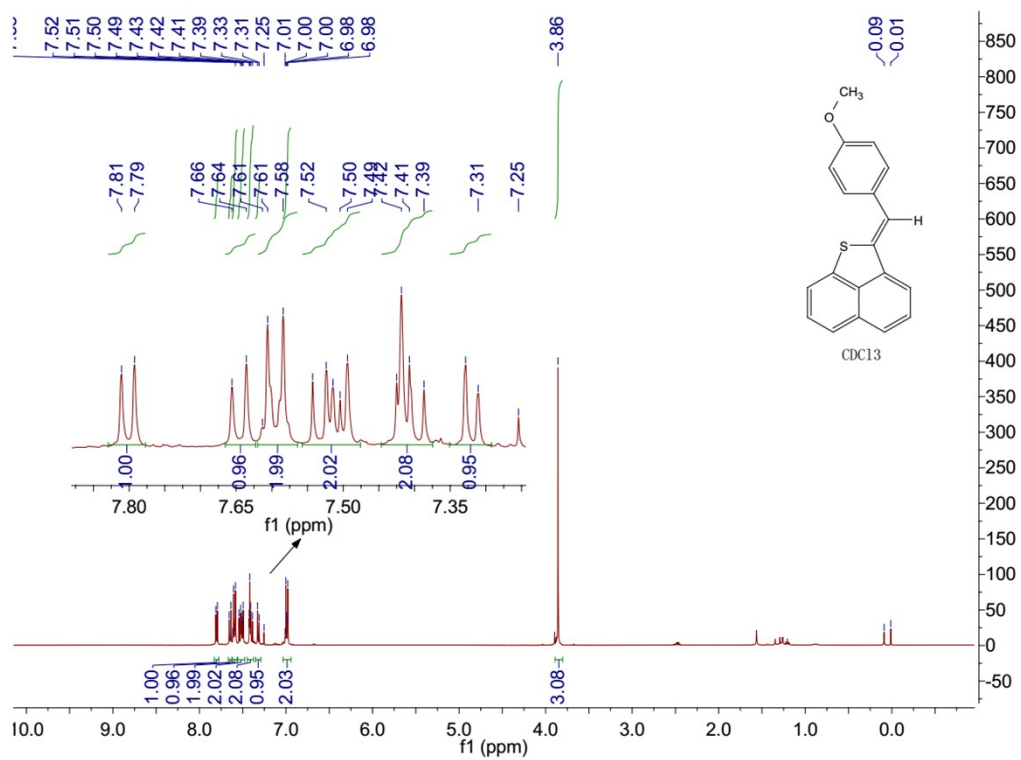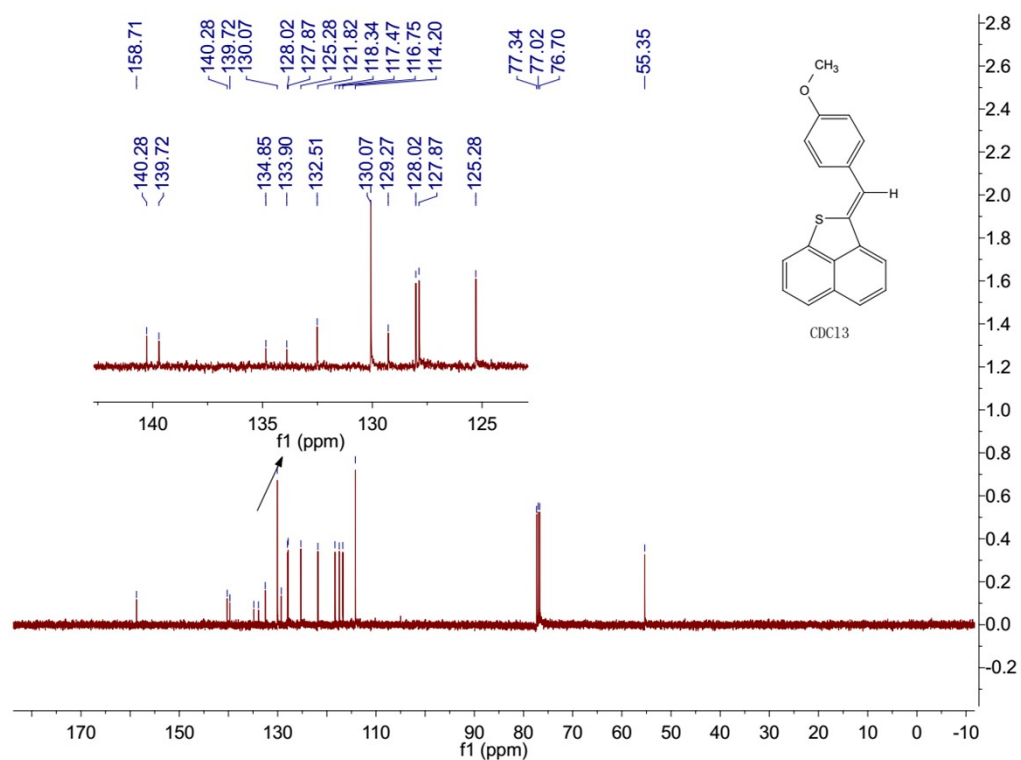

**(Z)-4-((2H-naphtho[1,8-bc]thiophen-2-ylidene)methyl)benzonitrile (3f)**

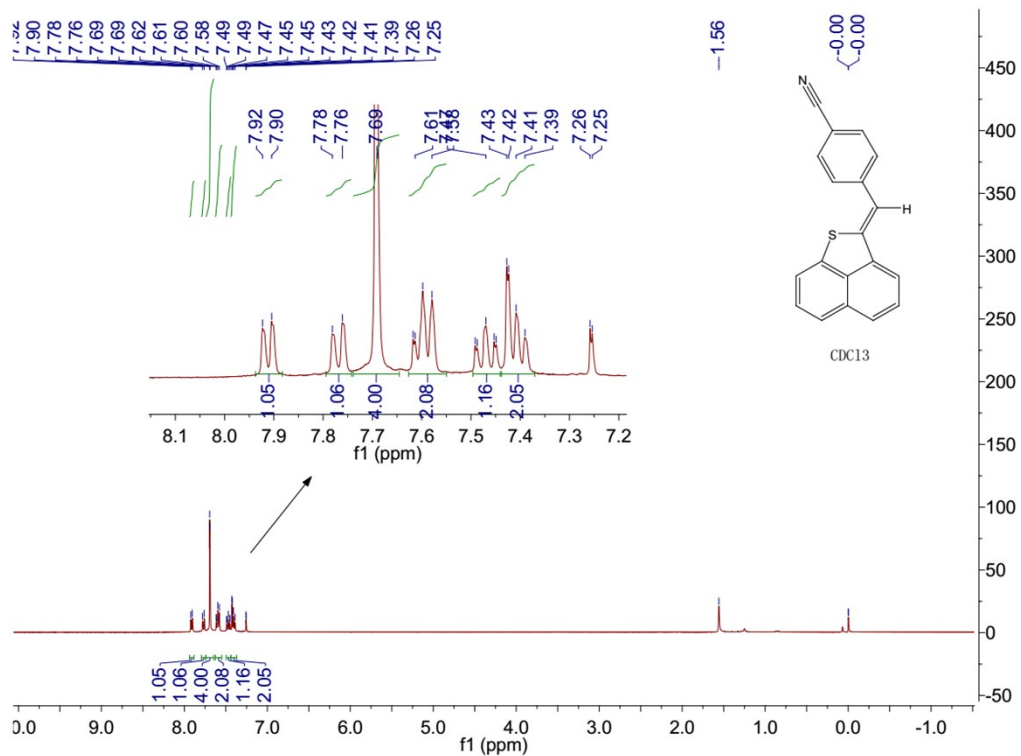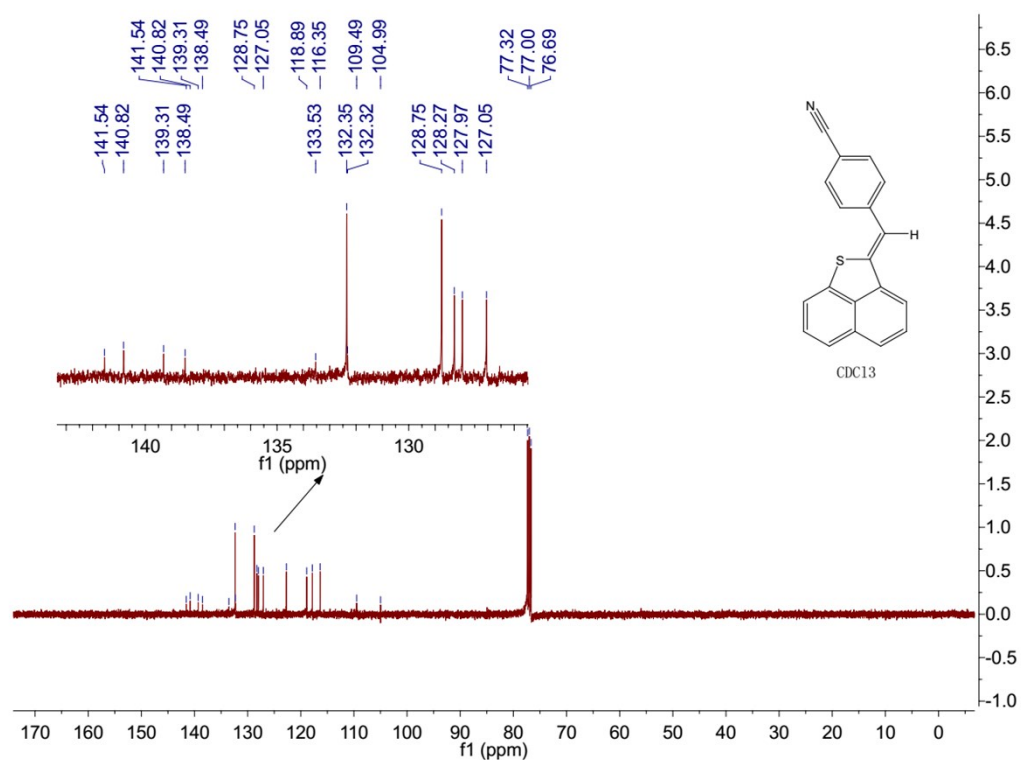

# Methyl (Z)-4-((2H-naphtho[1,8-bc]thiophen-2-ylidene)methyl)benzoate (3g)

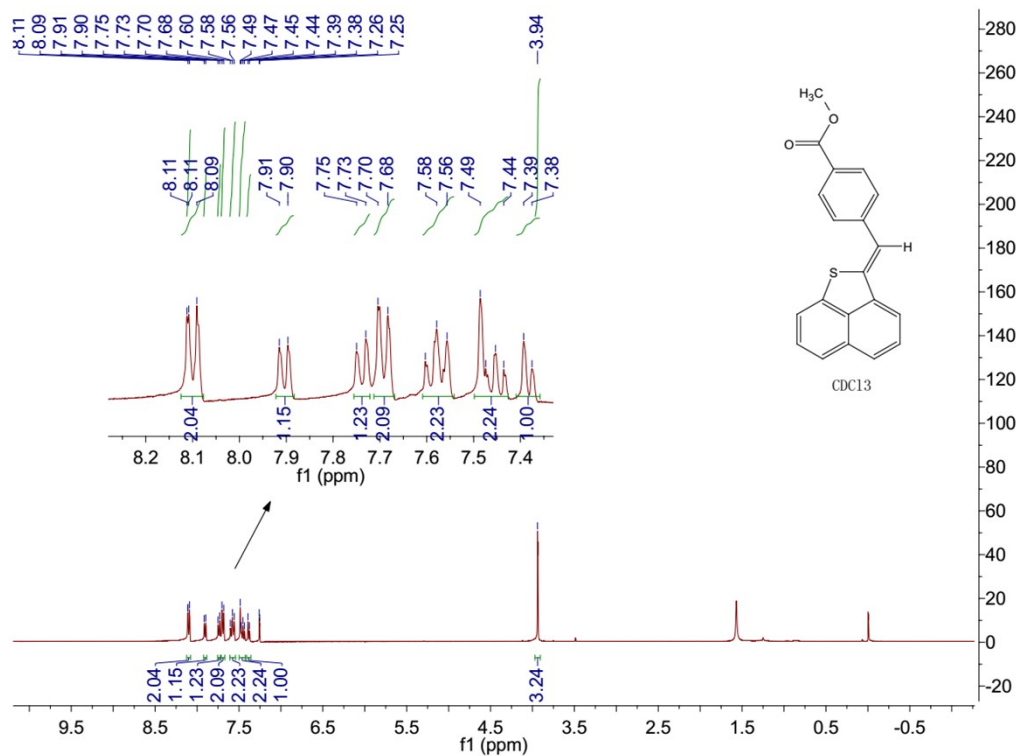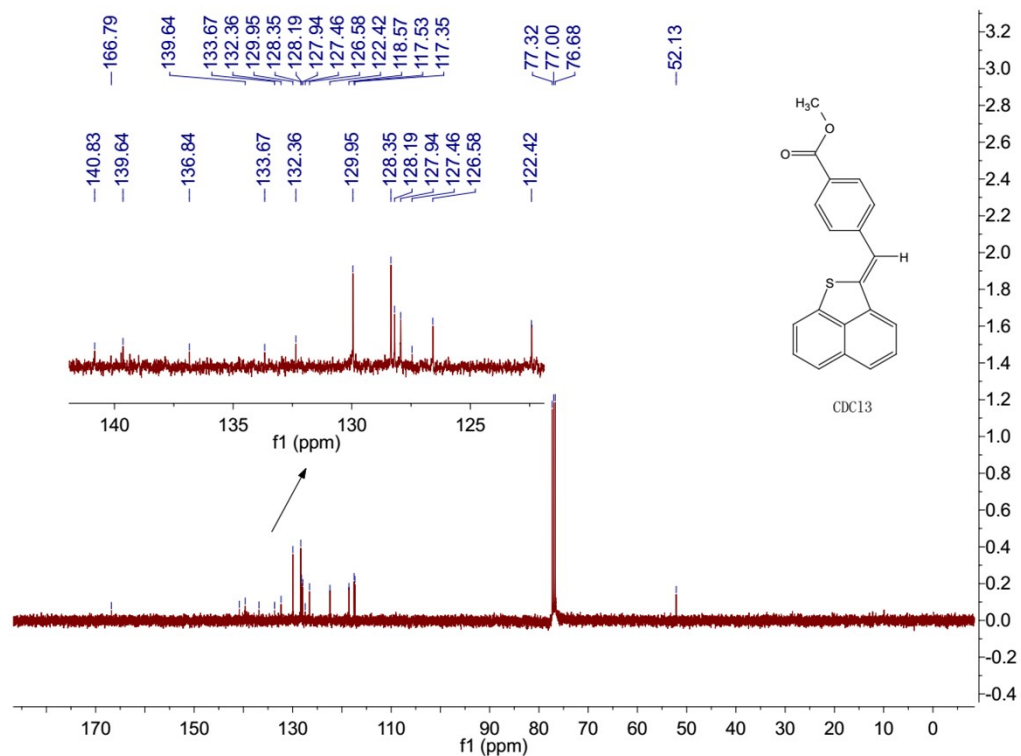

**(Z)-2-(4-chlorobenzylidene)-2H-naphtho[1,8-bc]thiophene (3h)**

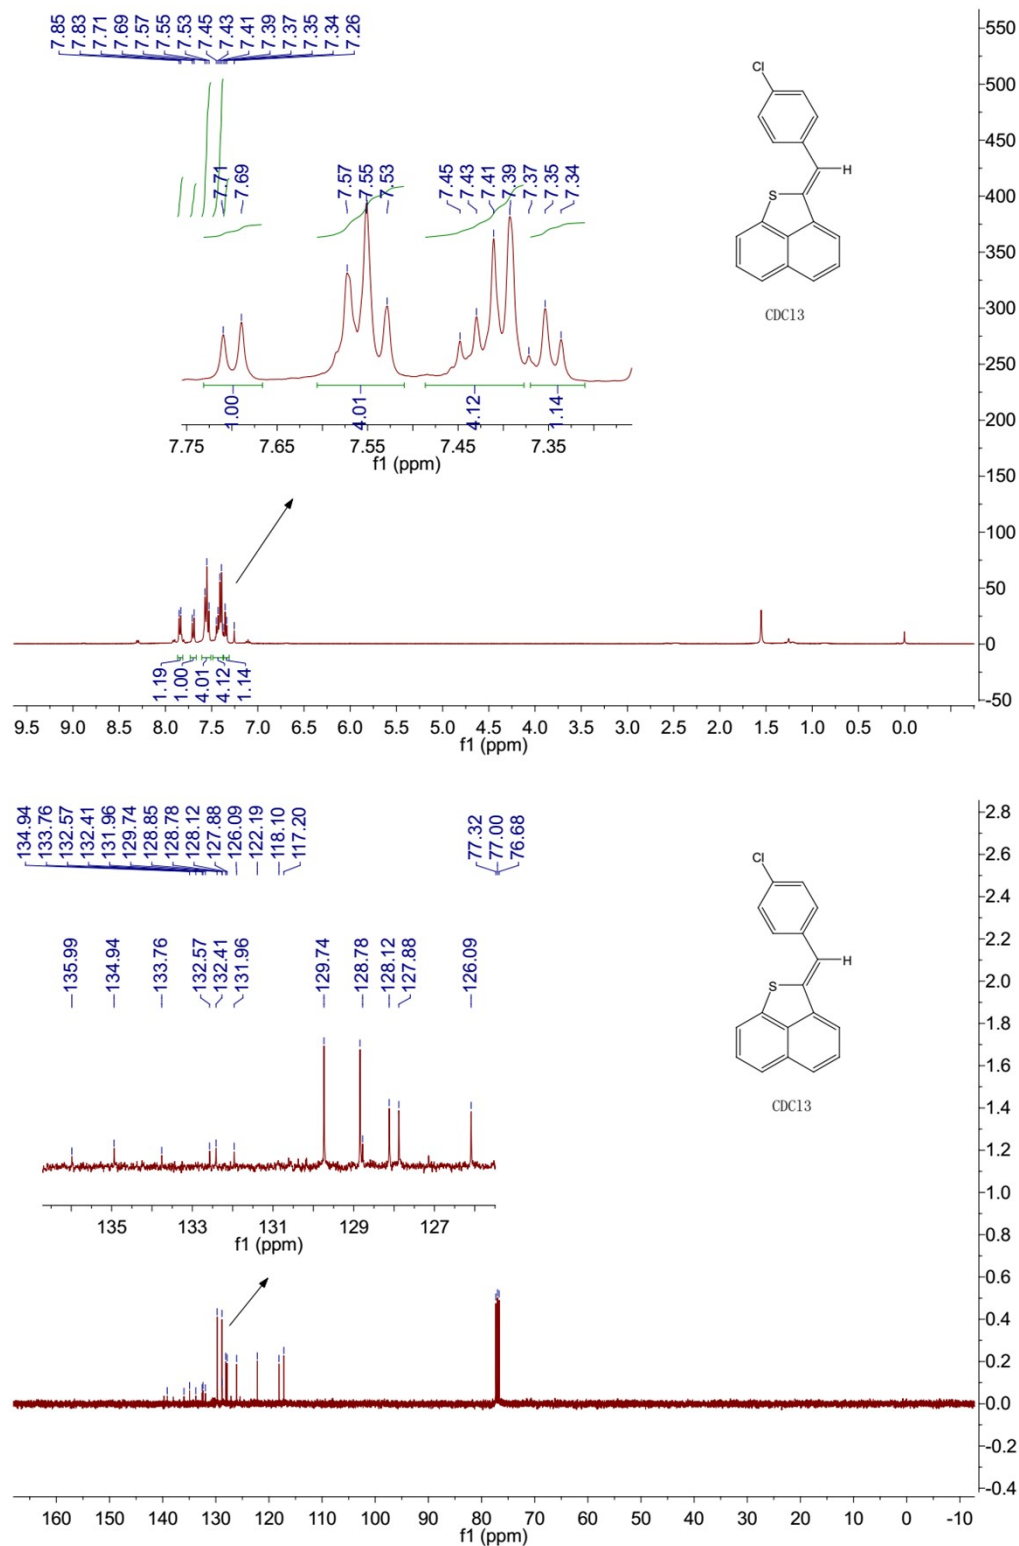

**(Z)-2-(4-fluorobenzylidene)-2H-naphtho[1,8-bc]thiophene (3i)**

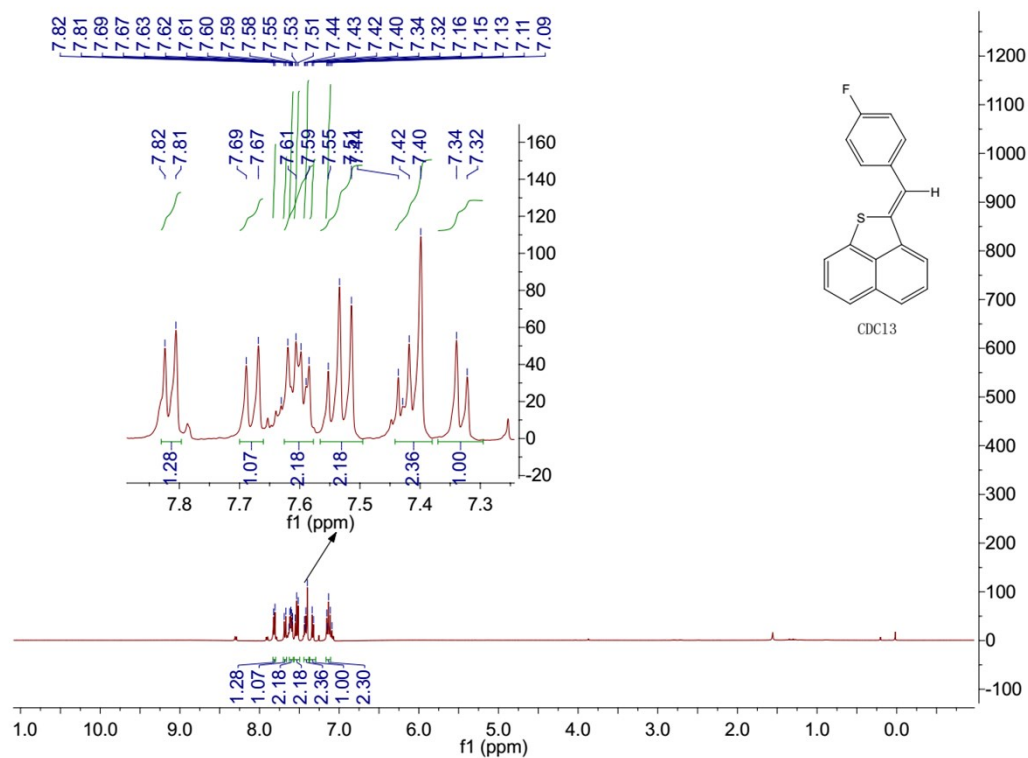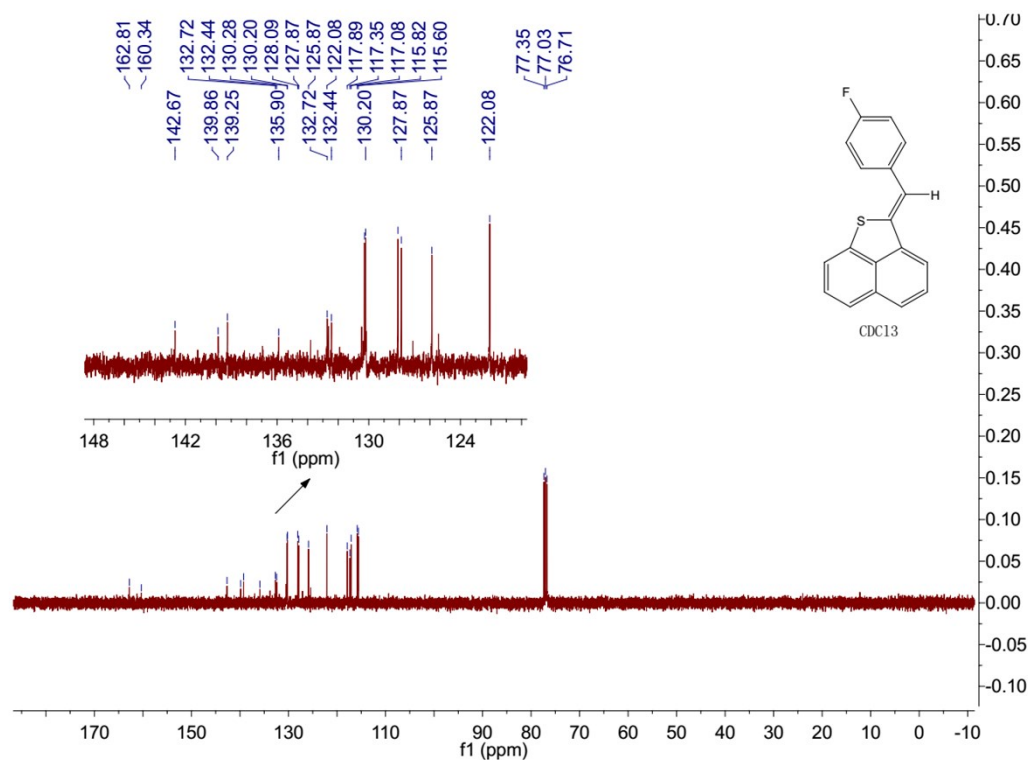

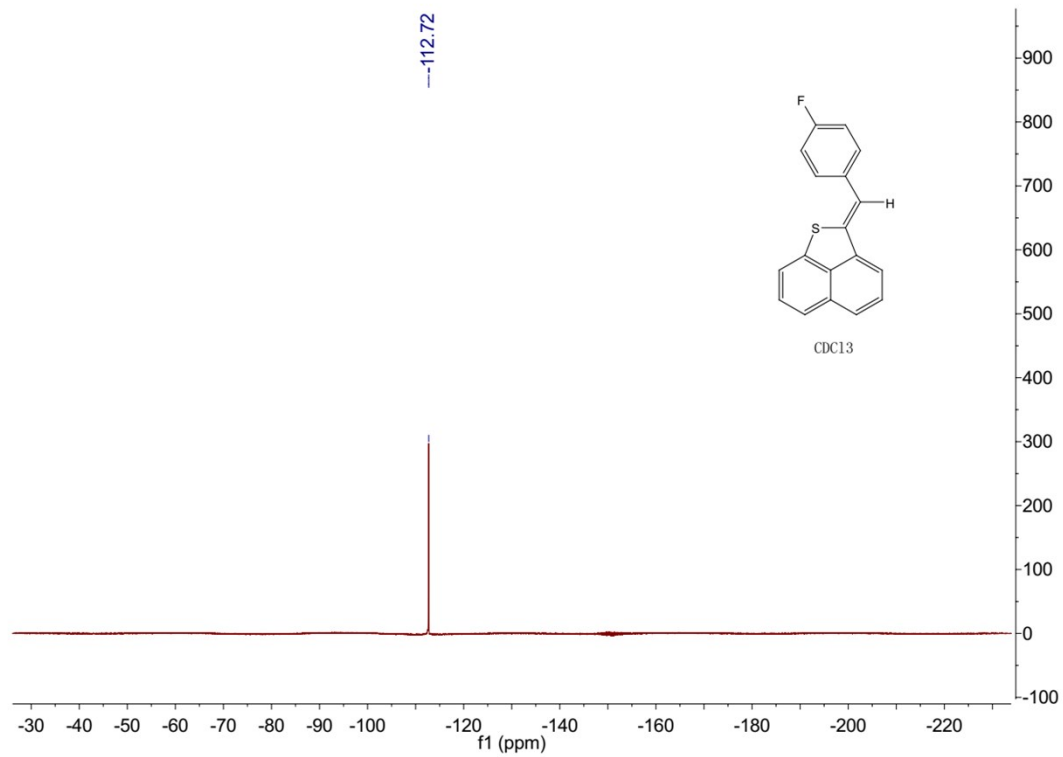



**(Z)-2-(3,4-dichlorobenzylidene)-2H-naphtho[1,8-bc]thiophene (3j)**

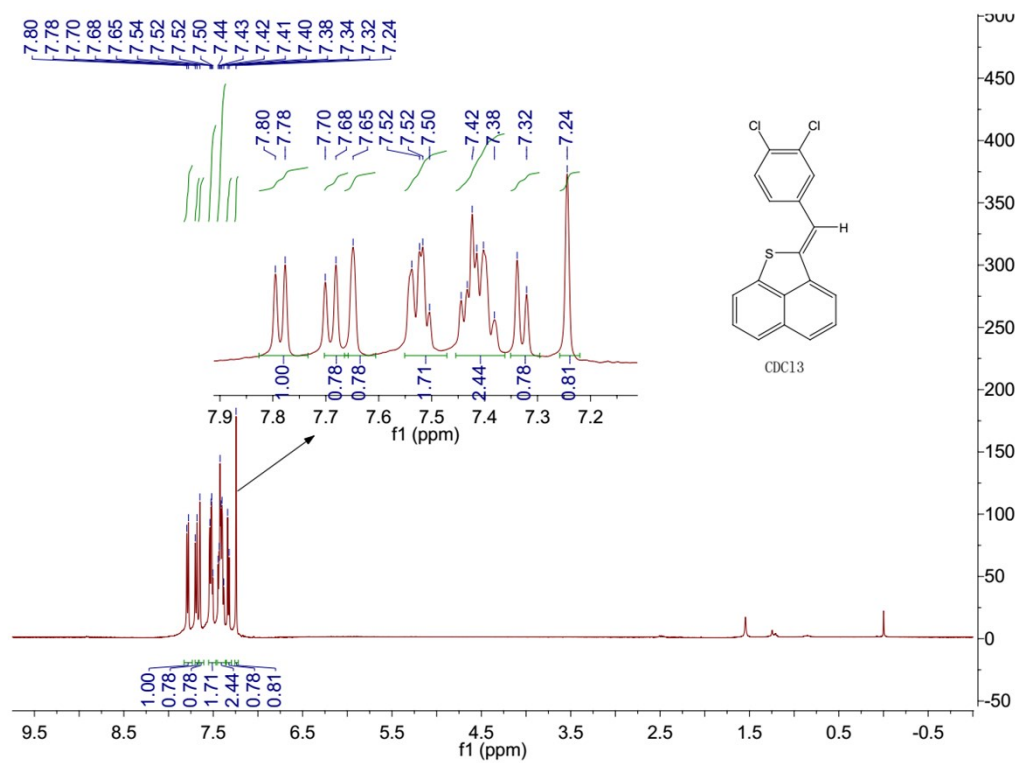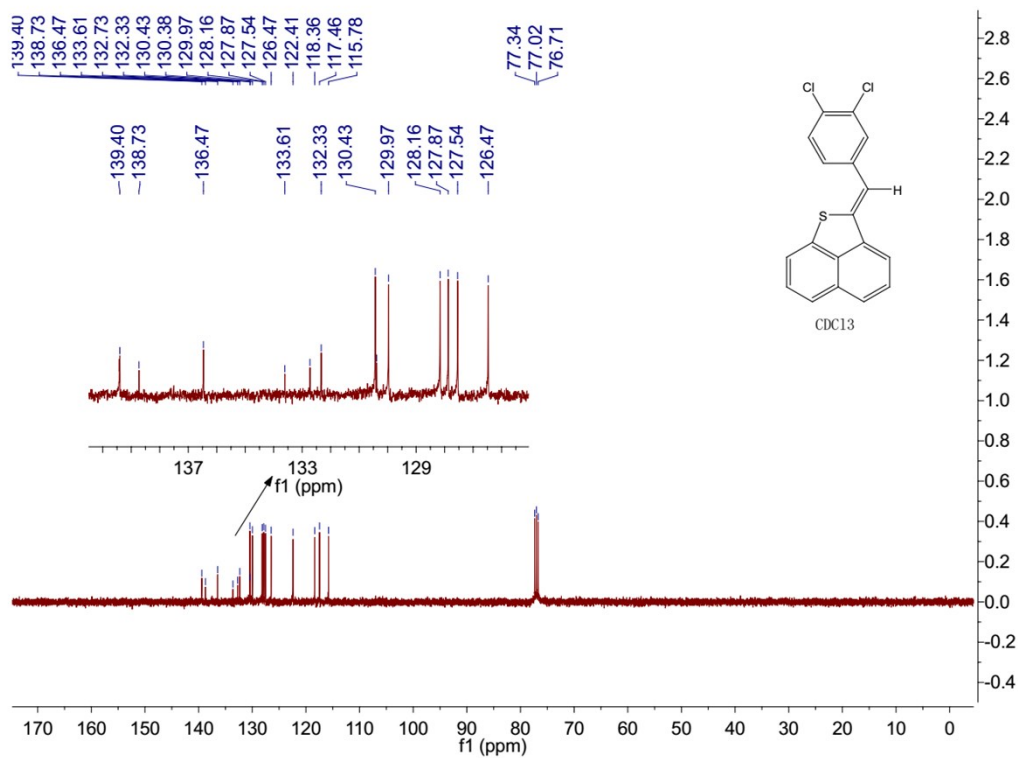



**(Z)-2-(naphthalen-1-ylmethylene)-2H-naphtho[1,8-bc]thiophene (3k)**

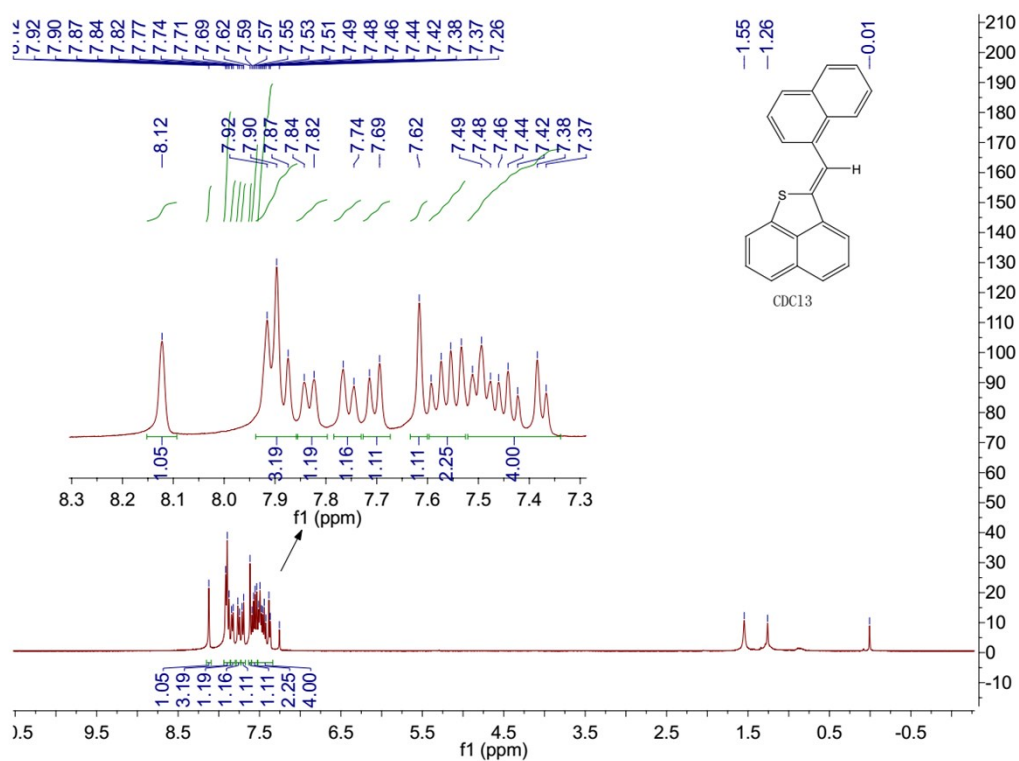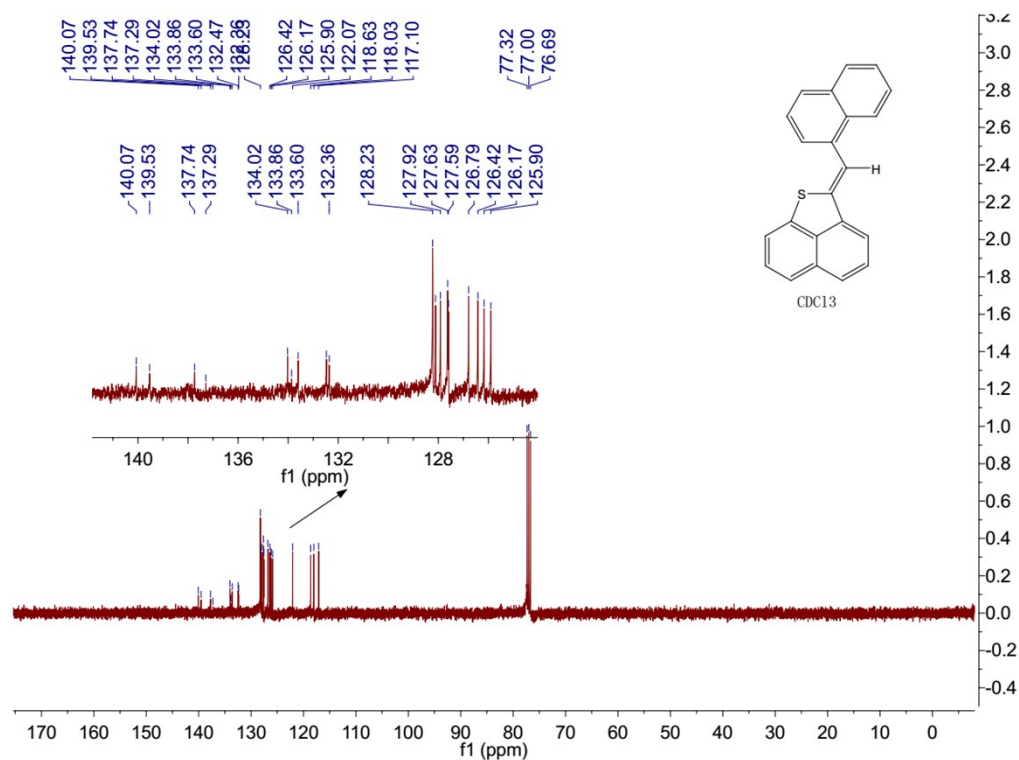

**(Z)-2-(3-methylbenzylidene)-2H-naphtho[1,8-bc]thiophene (3l)**

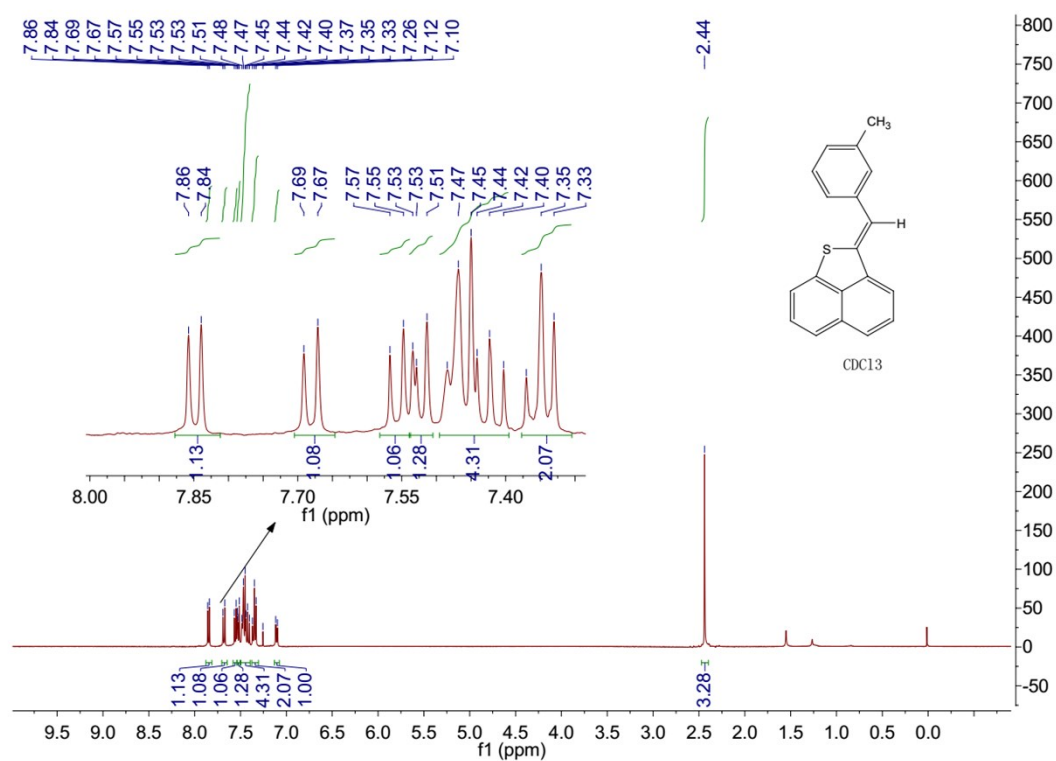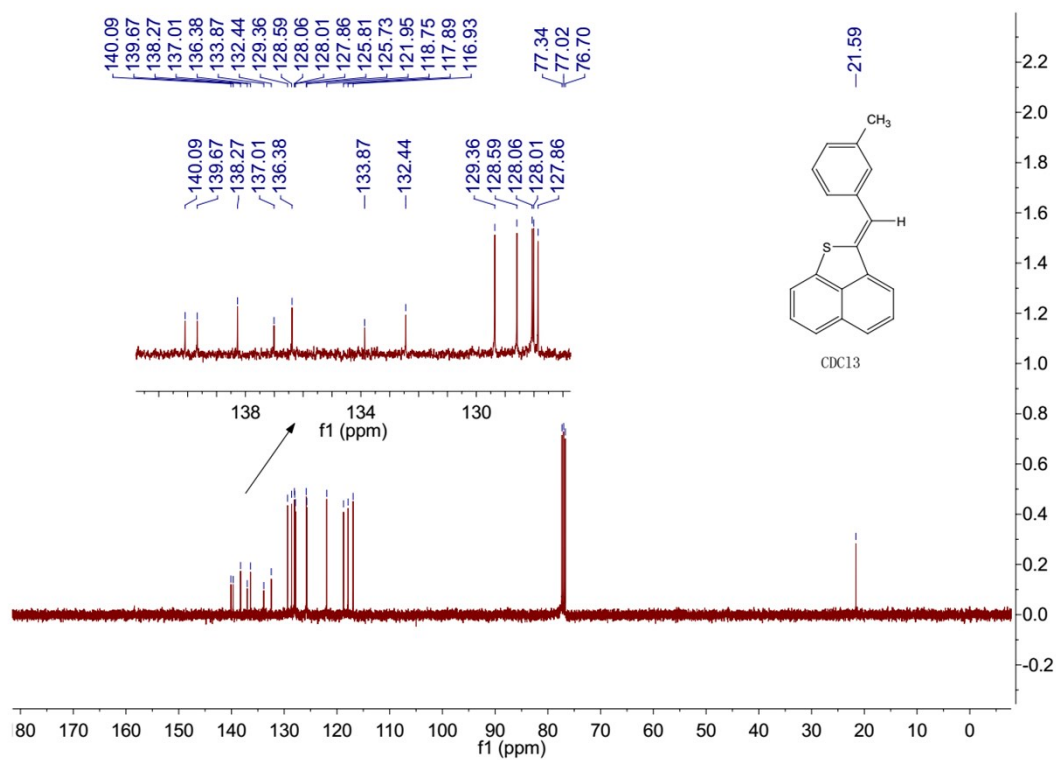

**(Z)-2-(3-fluorobenzylidene)-2H-naphtho[1,8-bc]thiophene (3m)**

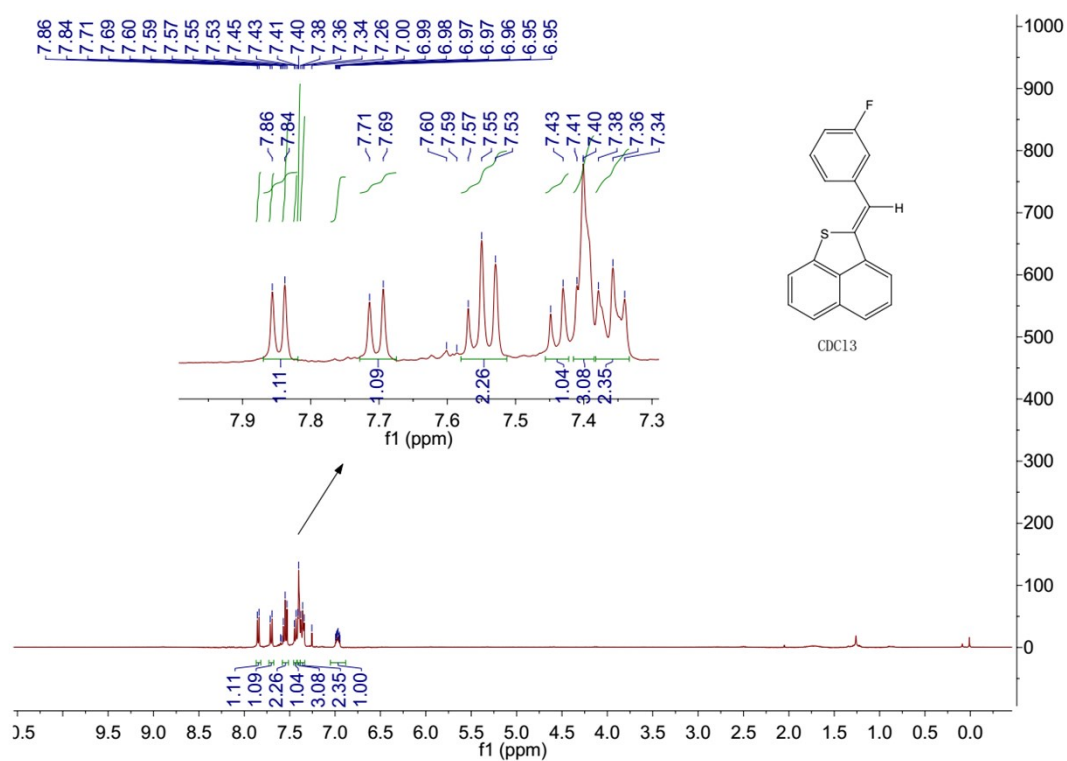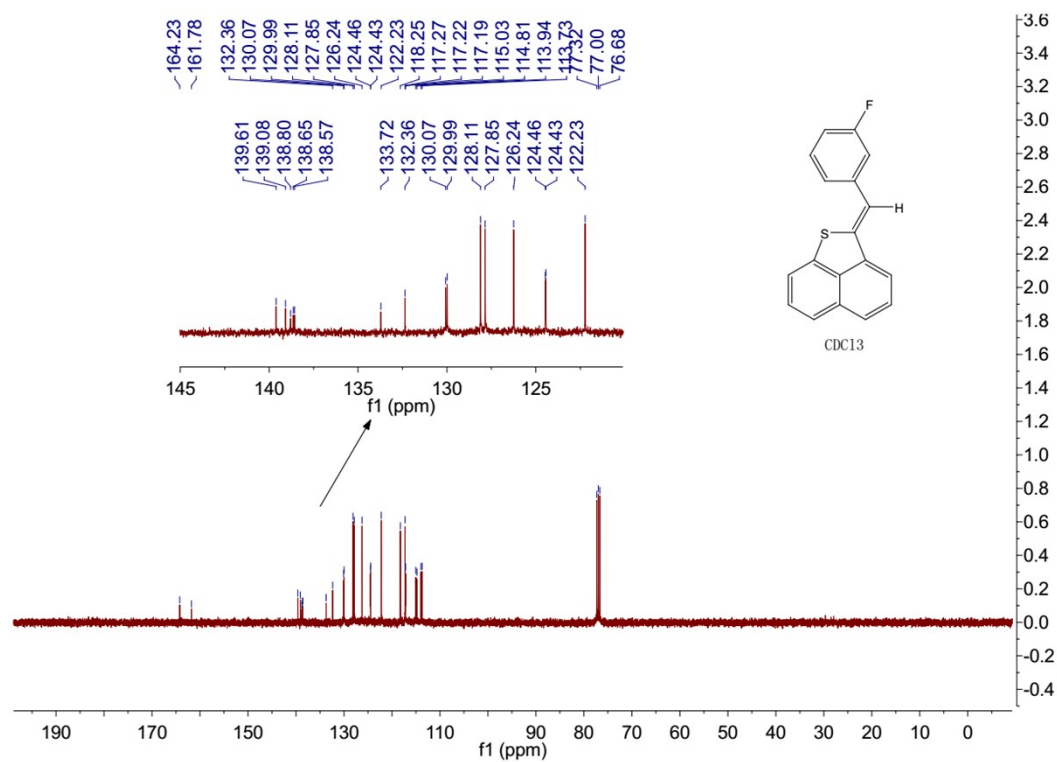

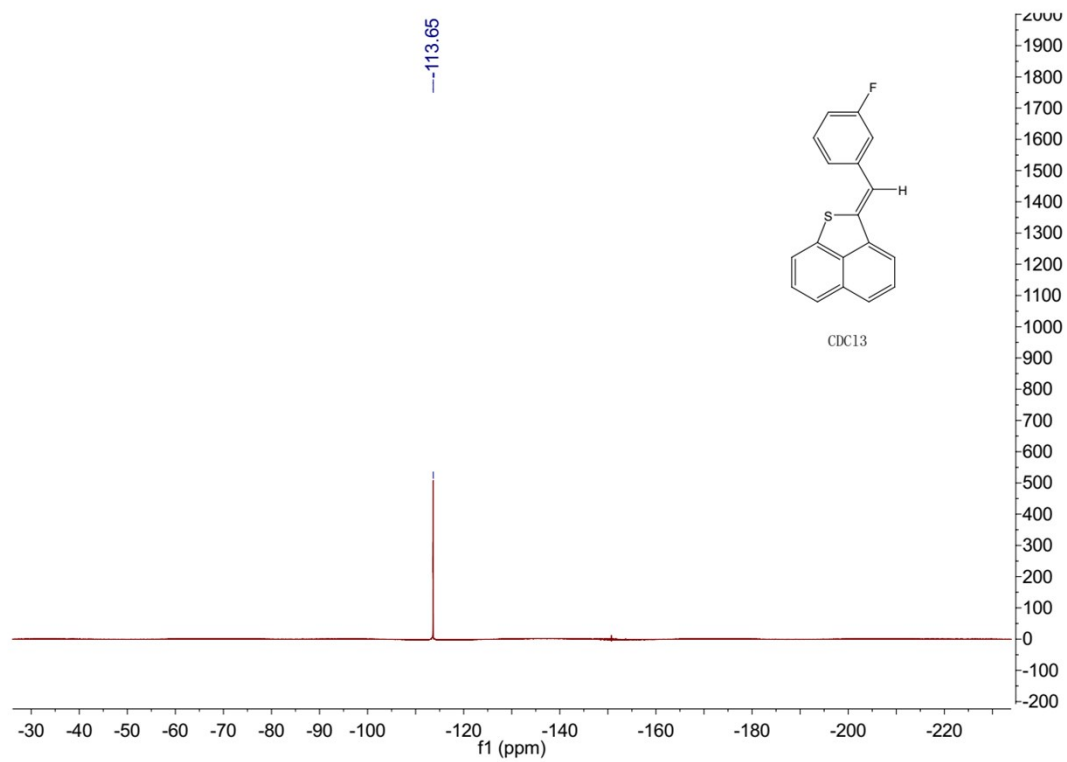

**(Z)-2-(2-chlorobenzylidene)-2H-naphtho[1,8-bc]thiophene (3n)**

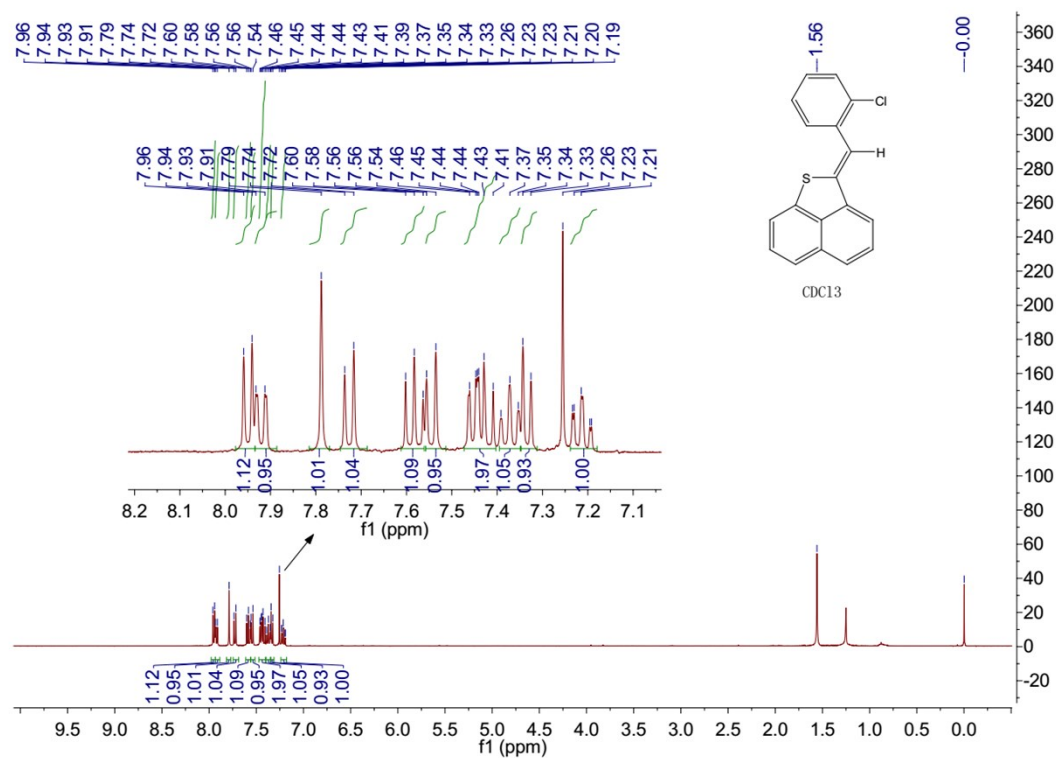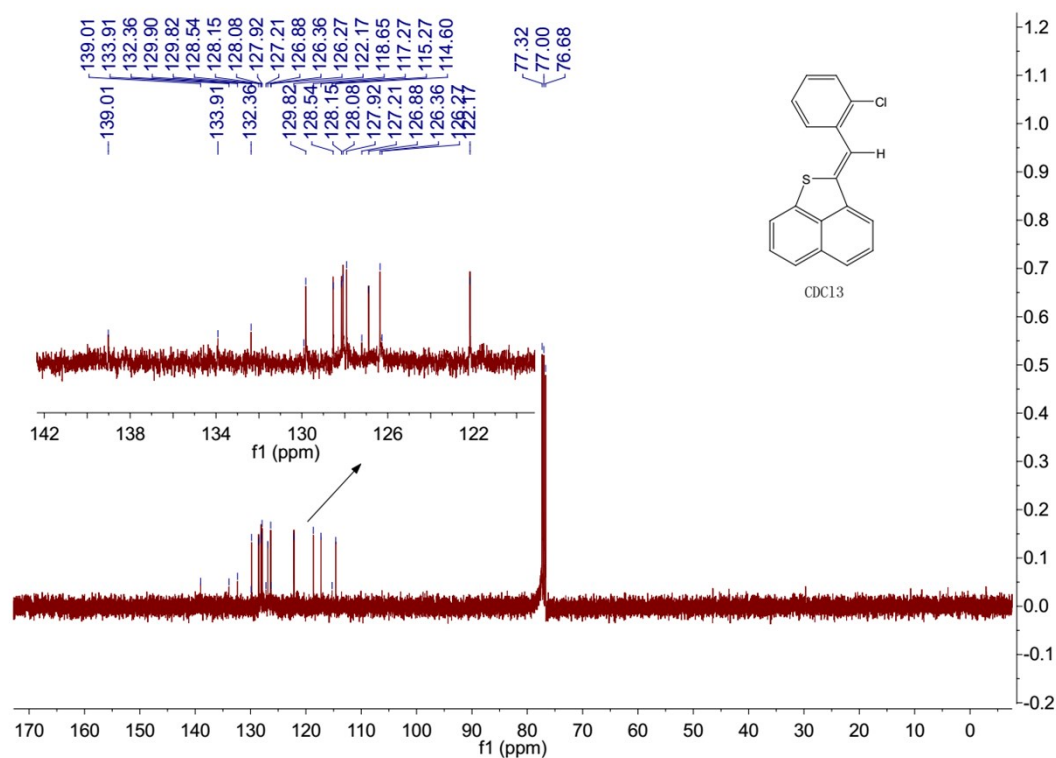

**(Z)-2-(2-methoxybenzylidene)-2H-naphtho[1,8-bc]thiophene (3o)**

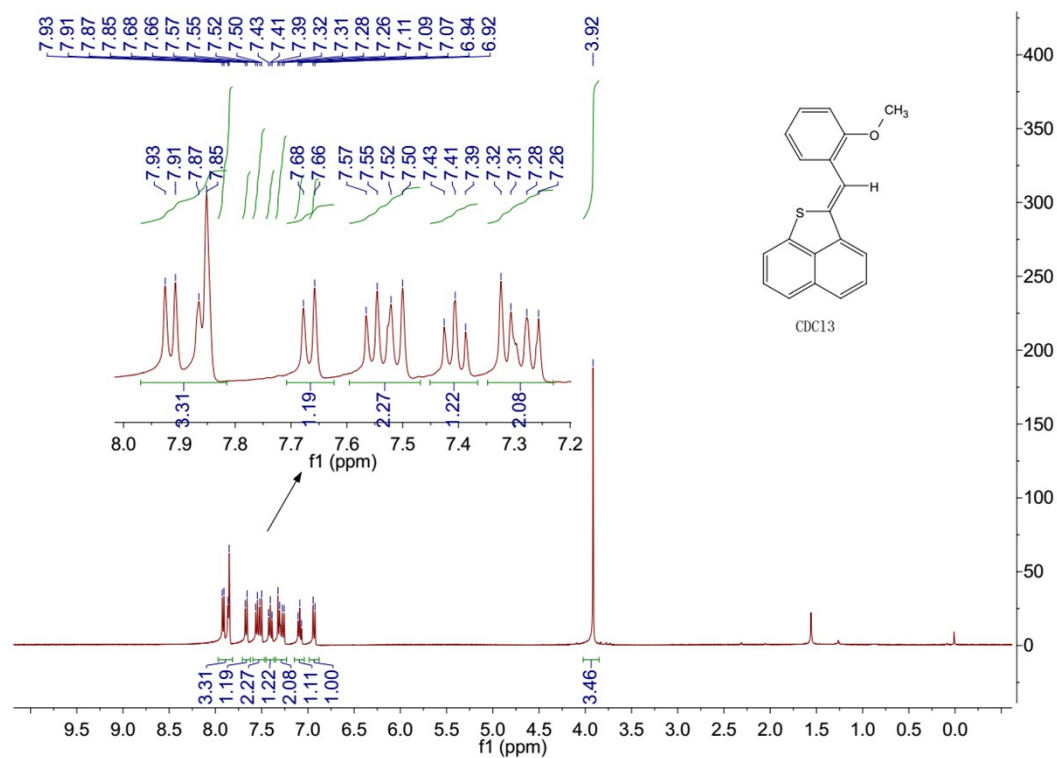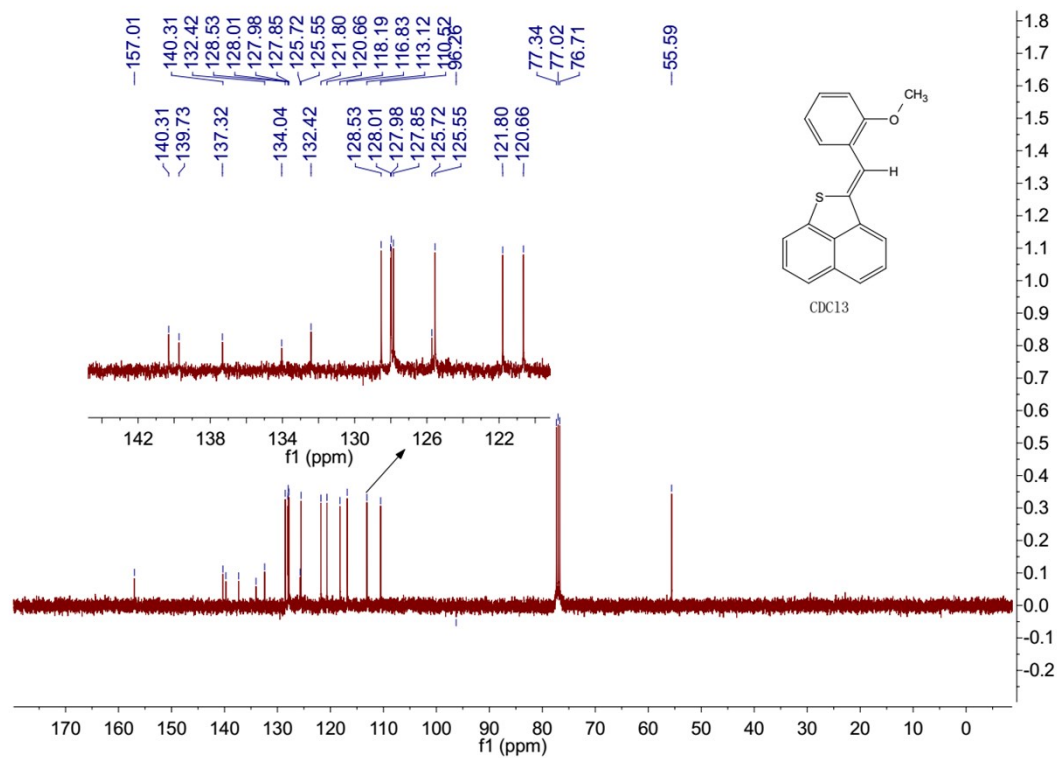

**(Z)-2-(thiophen-3-ylmethylene)-2H-naphtho[1,8-*bc*]thiophene (3p)**

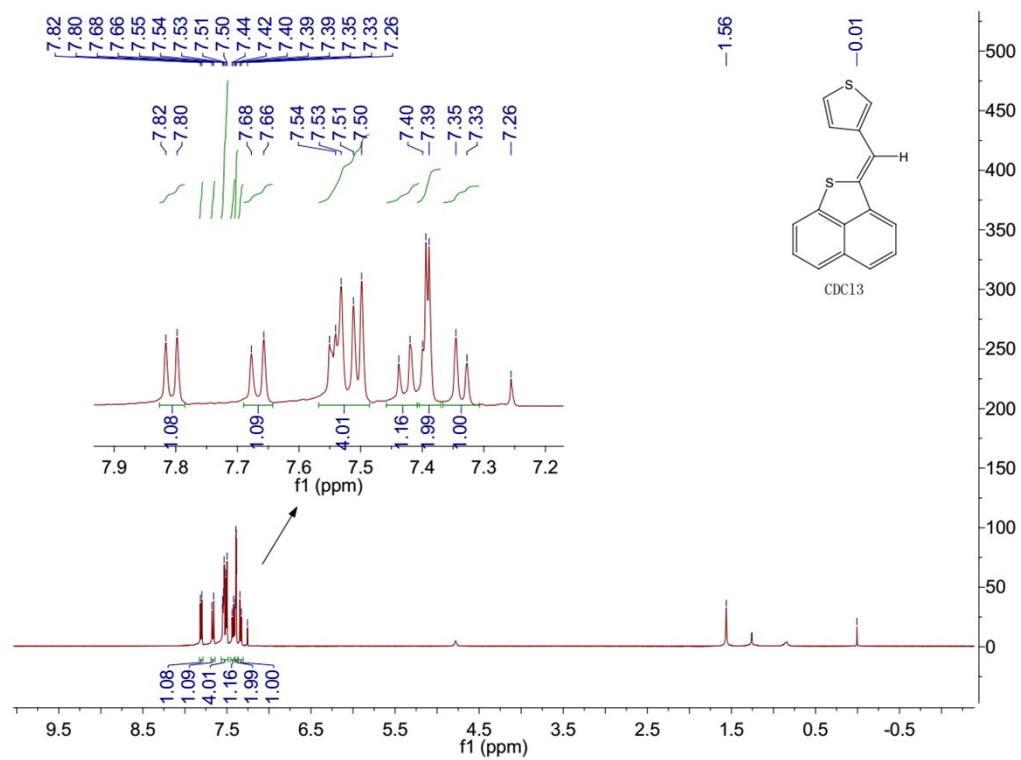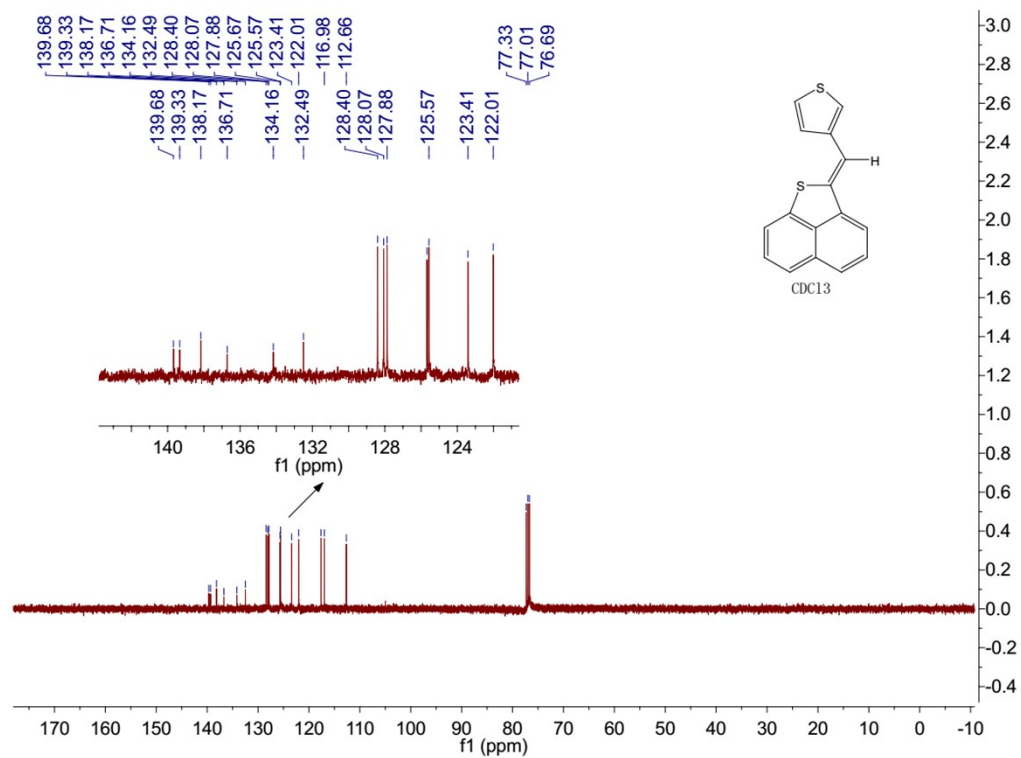



**(Z)-2-(thiophen-2-ylmethylene)-2H-naphtho[1,8-*bc*]thiophene (3q)**

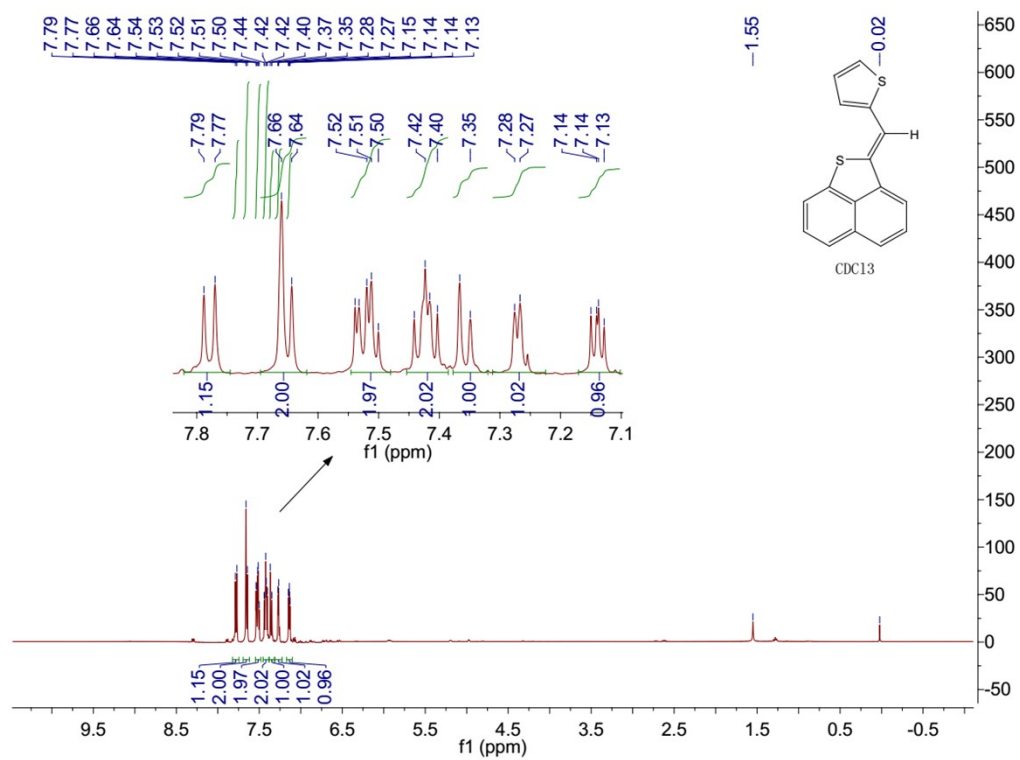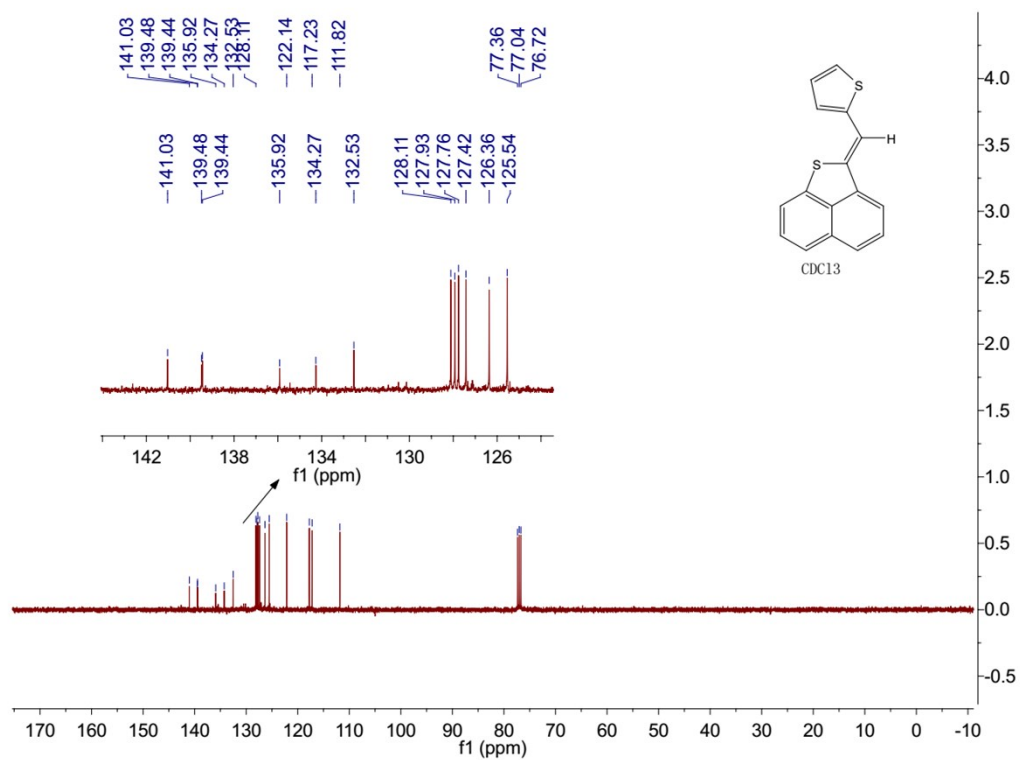



**(Z)-2-pentylidene-2H-naphtho[1,8-bc]thiophene (3r)**

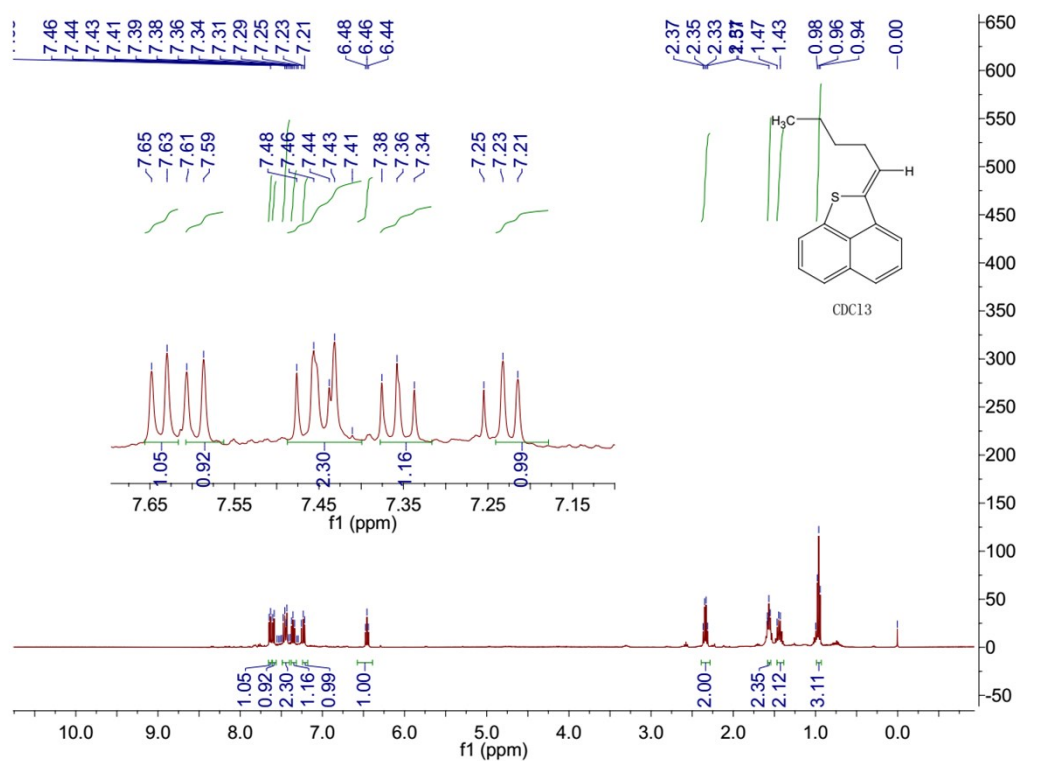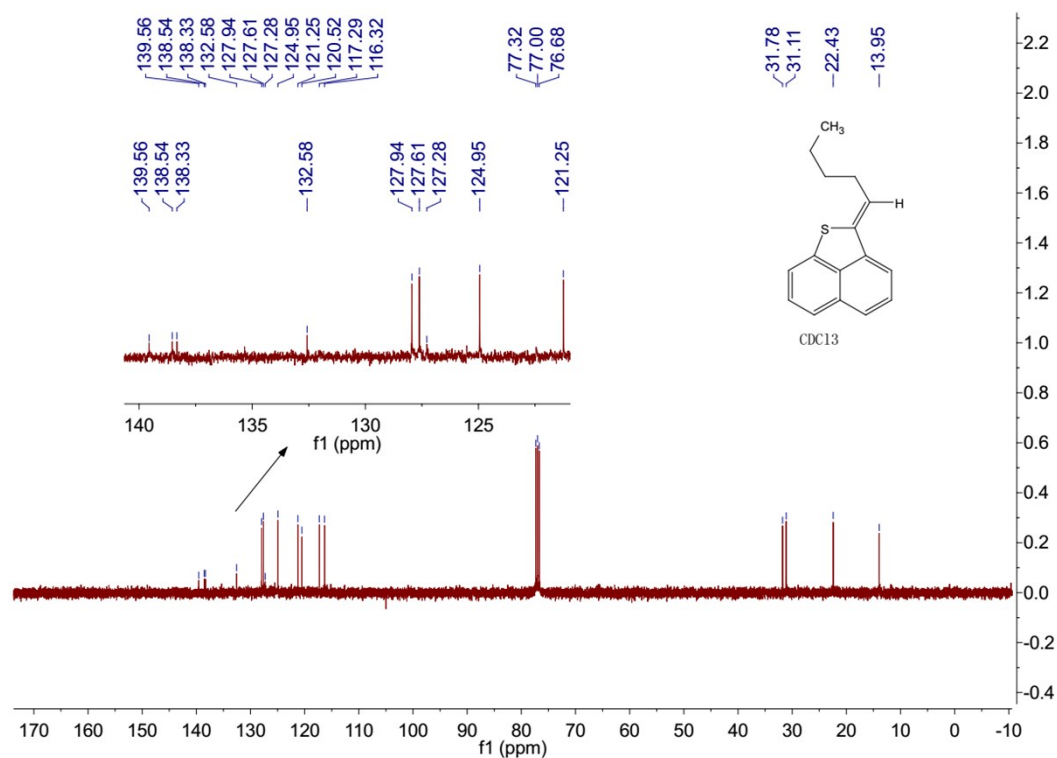

**(Z)-2-(cyclopropylmethylene)-2H-naphtho[1,8-bc]thiophene (3s)**

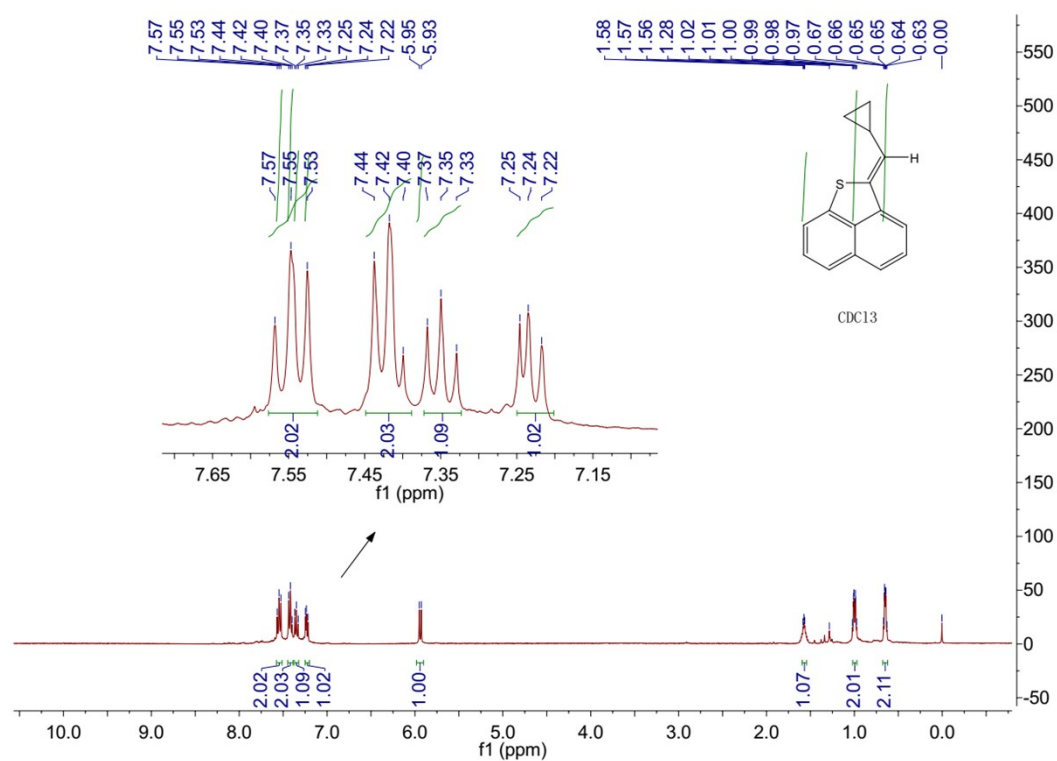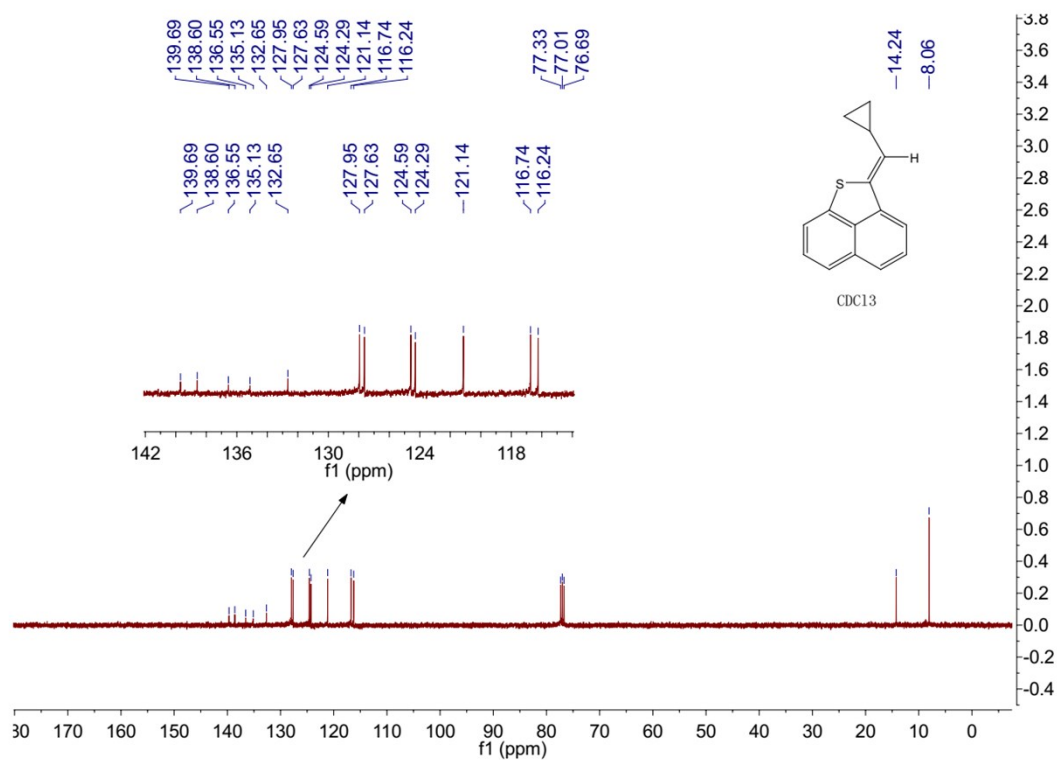

**Ethyl (Z)-2-(2H-naphtho[1,8-bc]thiophen-2-ylidene)acetate (3t)**

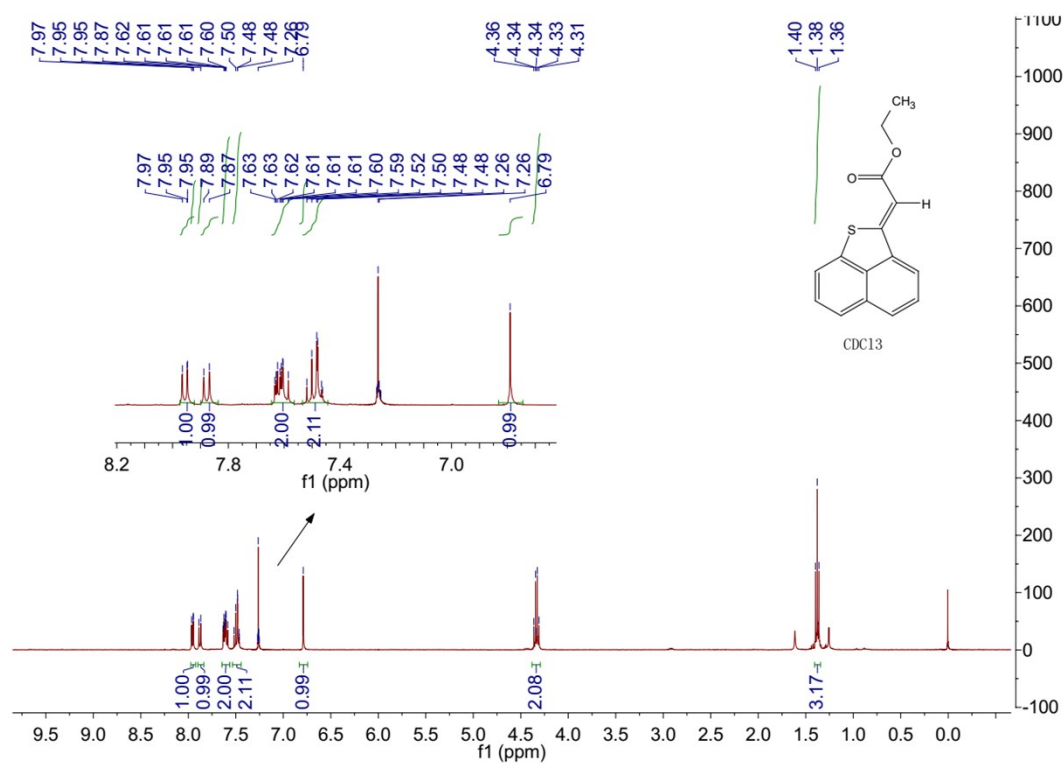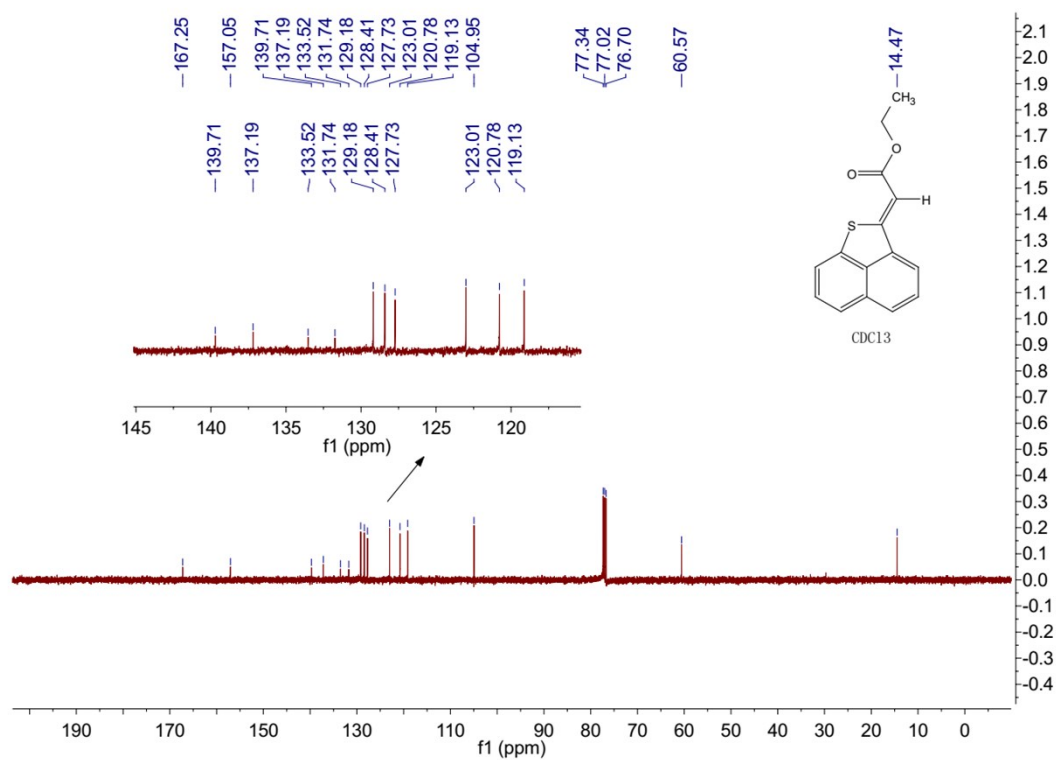

**(Z)-2-(4-methoxybenzylidene)-5,6-dihydro-2H-acenaphtho[5,6-*bc*]thiophene (3u)**

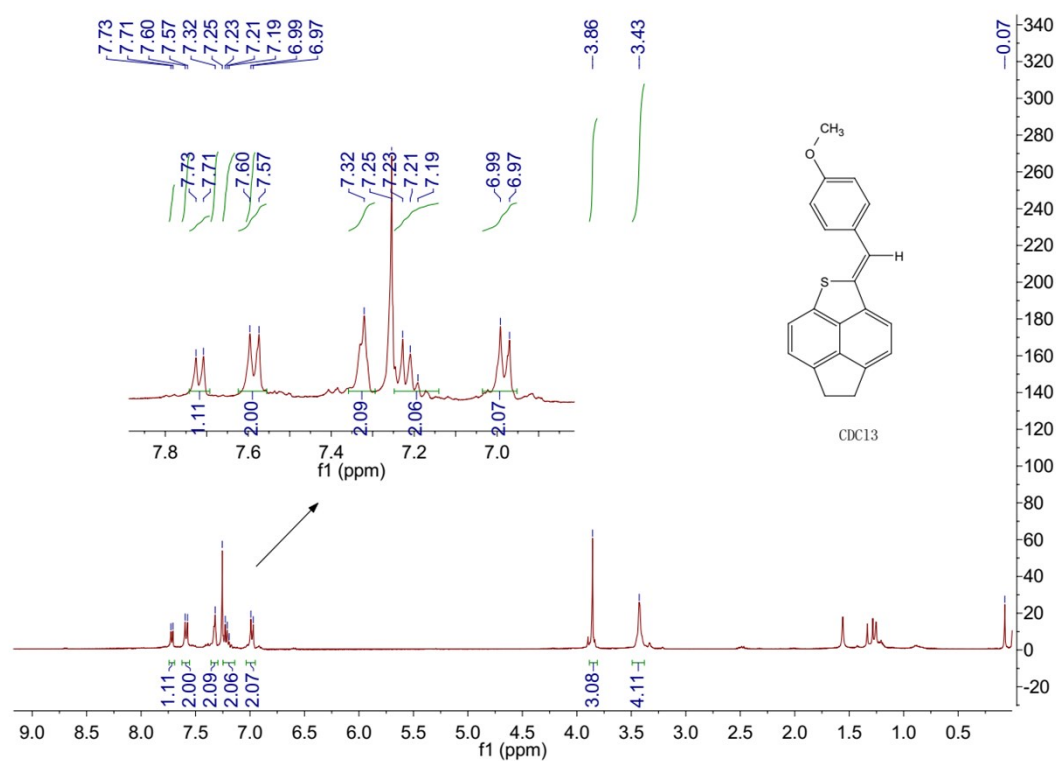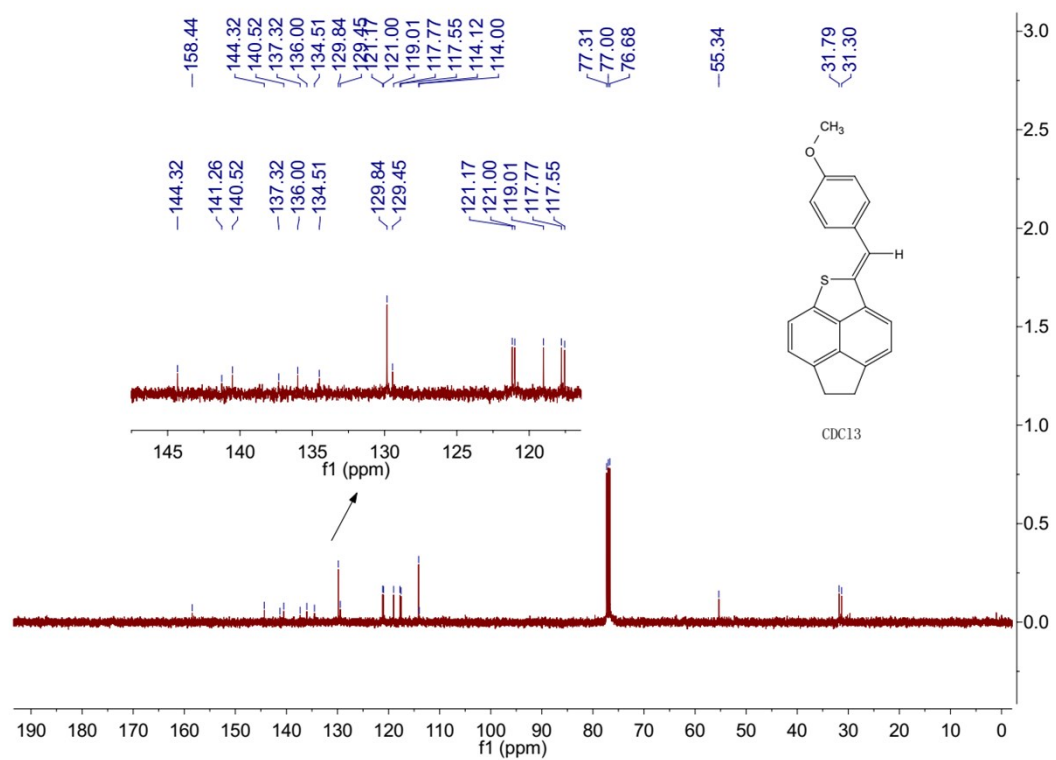

**(Z)-6-butyl-2-(4-chlorobenzylidene)thieno[2',3',4':4,5]naphtho[1,8-cd]pyridine-5,7(2H,6H)-dione (3v)**

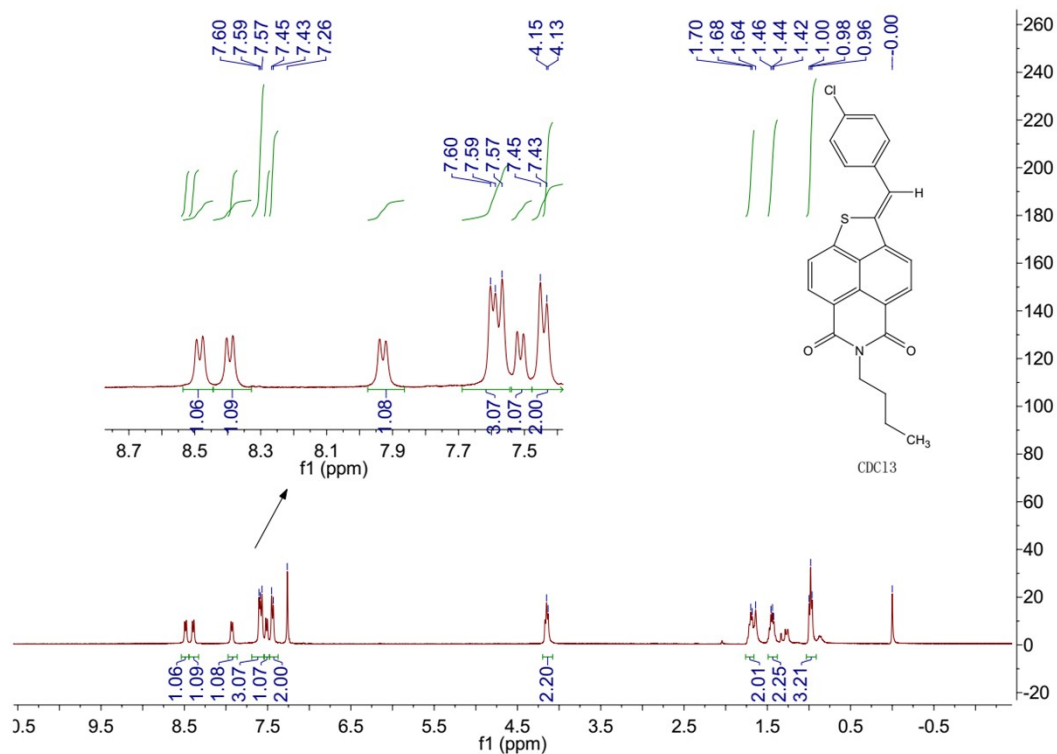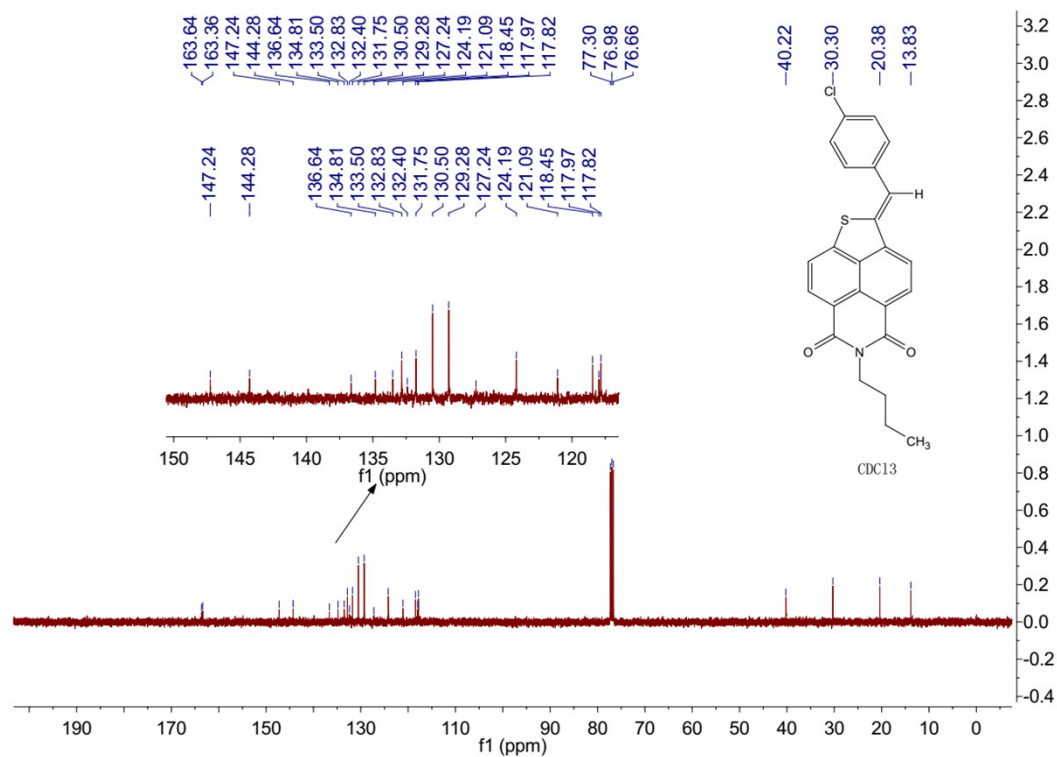

**(Z)-6-butyl-2-(4-methoxybenzylidene)thieno[2',3',4':4,5]naphtho[1,8-cd]pyridine-5,7(2H,6H)-dione (3w)**

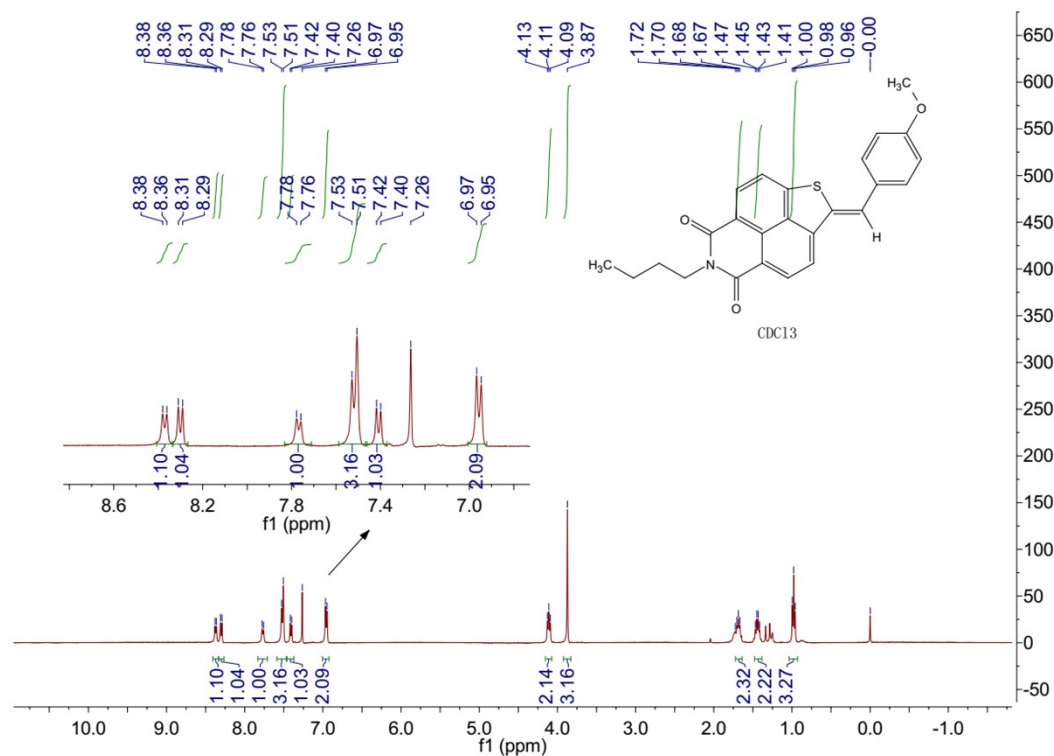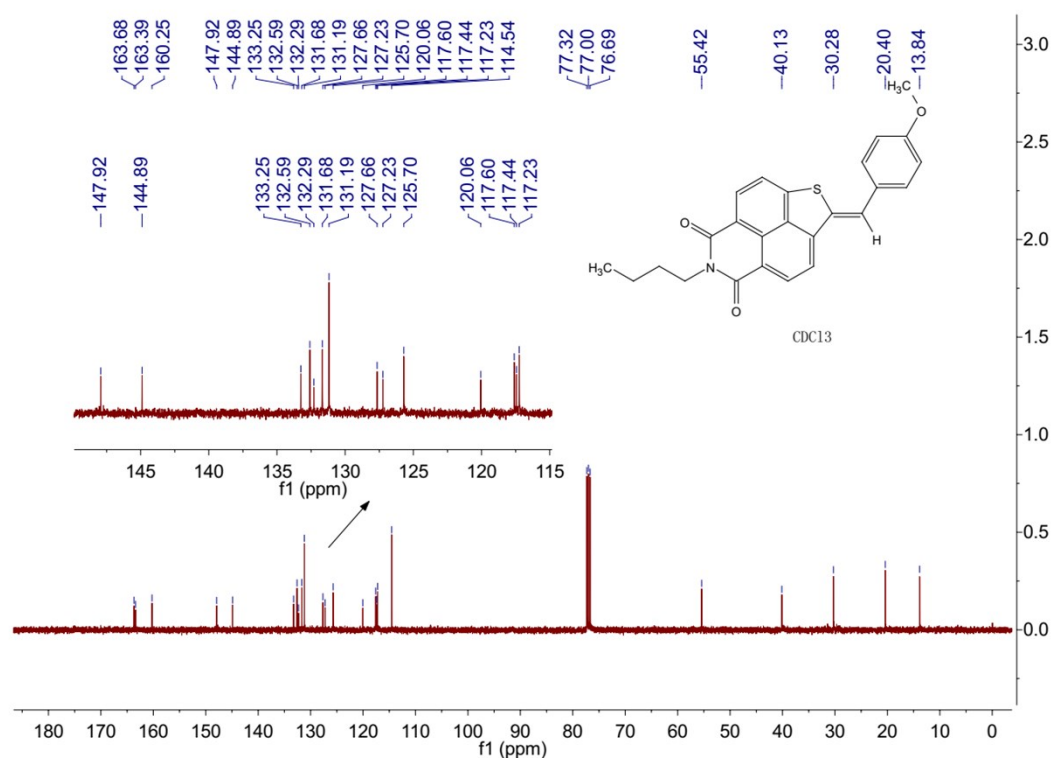



**(Z)-2-((4-methylphenyl)methylene-*d*)-2H-naphtho[1,8-*bc*]thiophene (5a)**

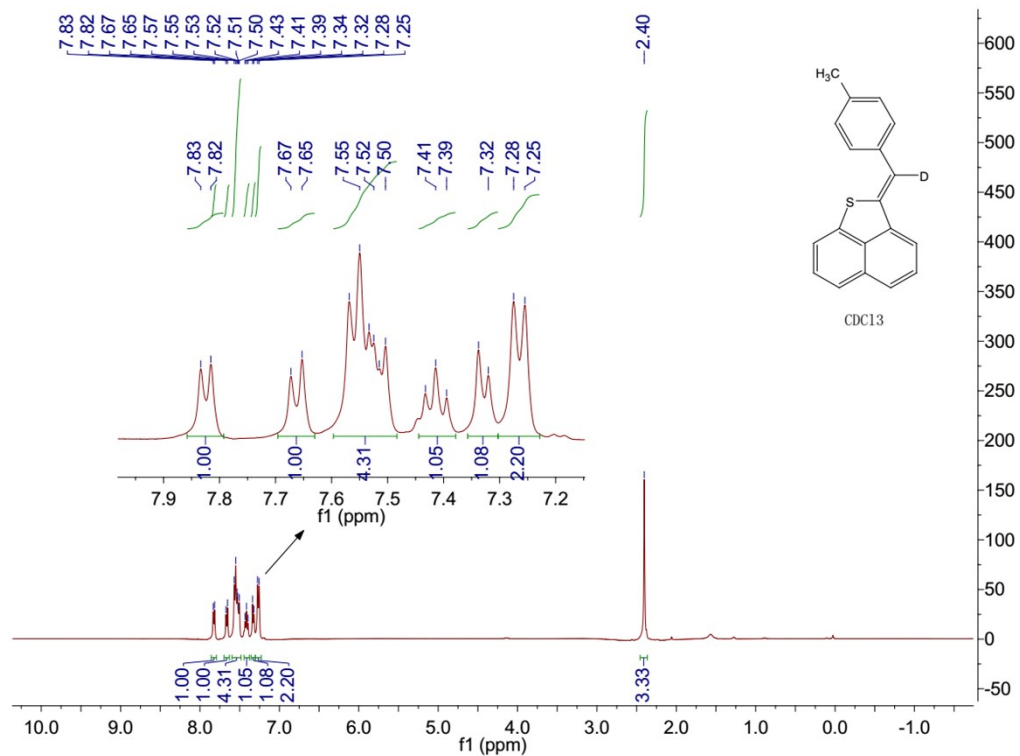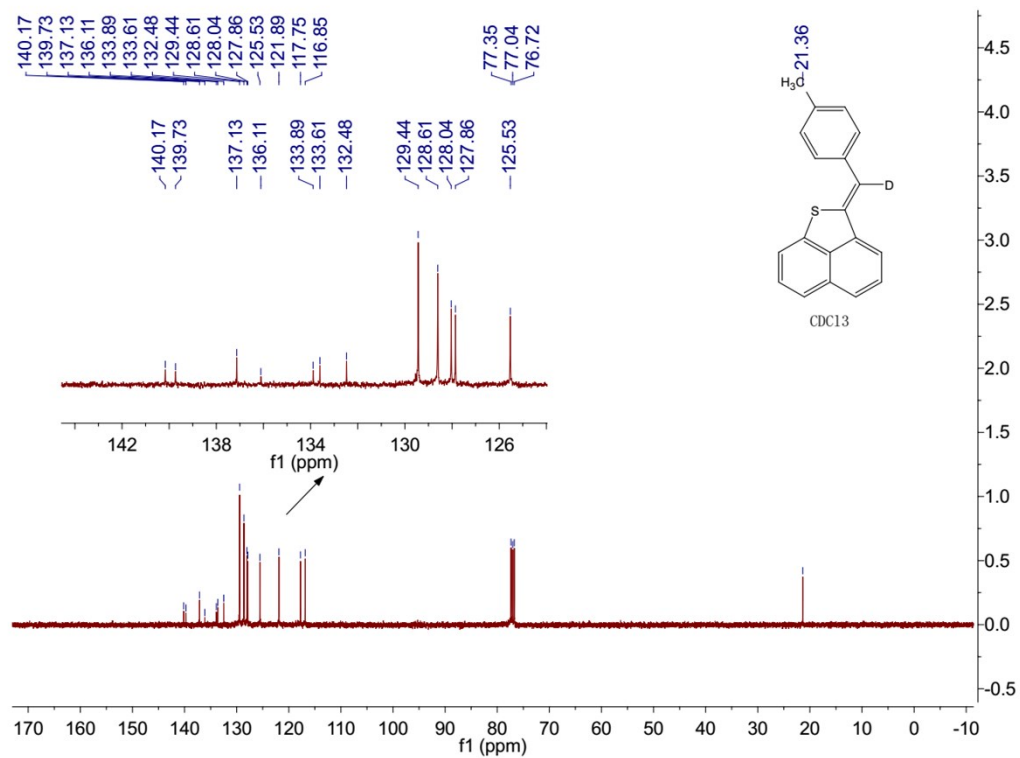

**(Z)-2-((4-chlorophenyl)methylene-*d*)-2*H*-naphtho[1,8-*bc*]thiophene (5b)**

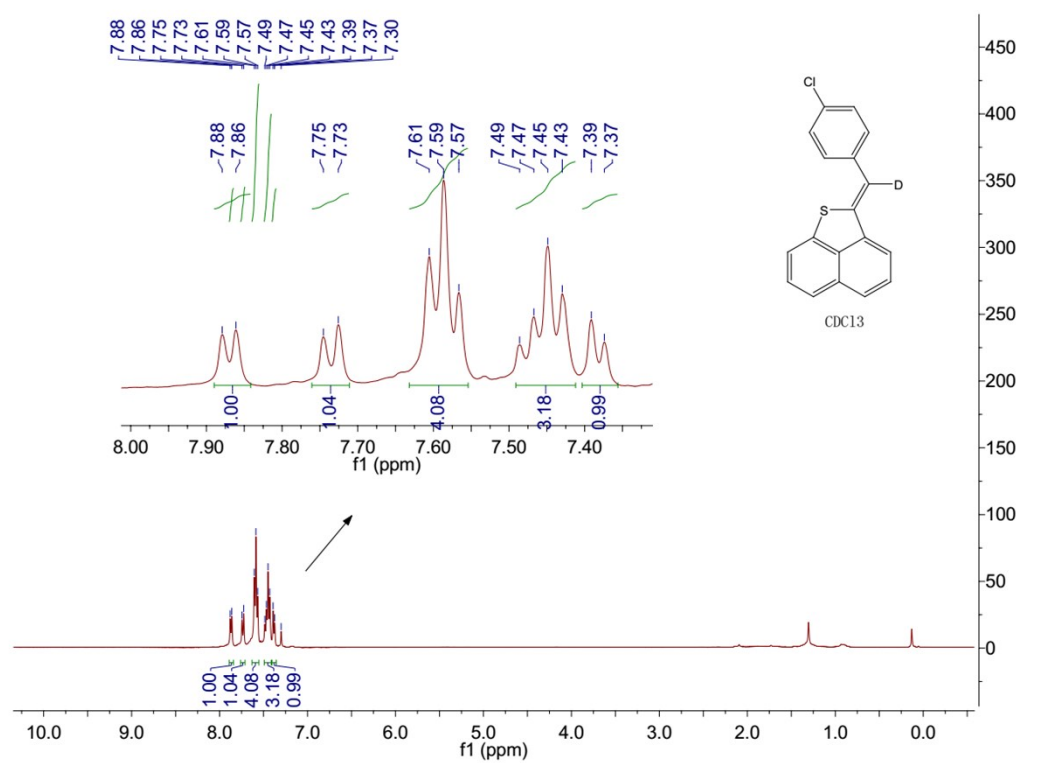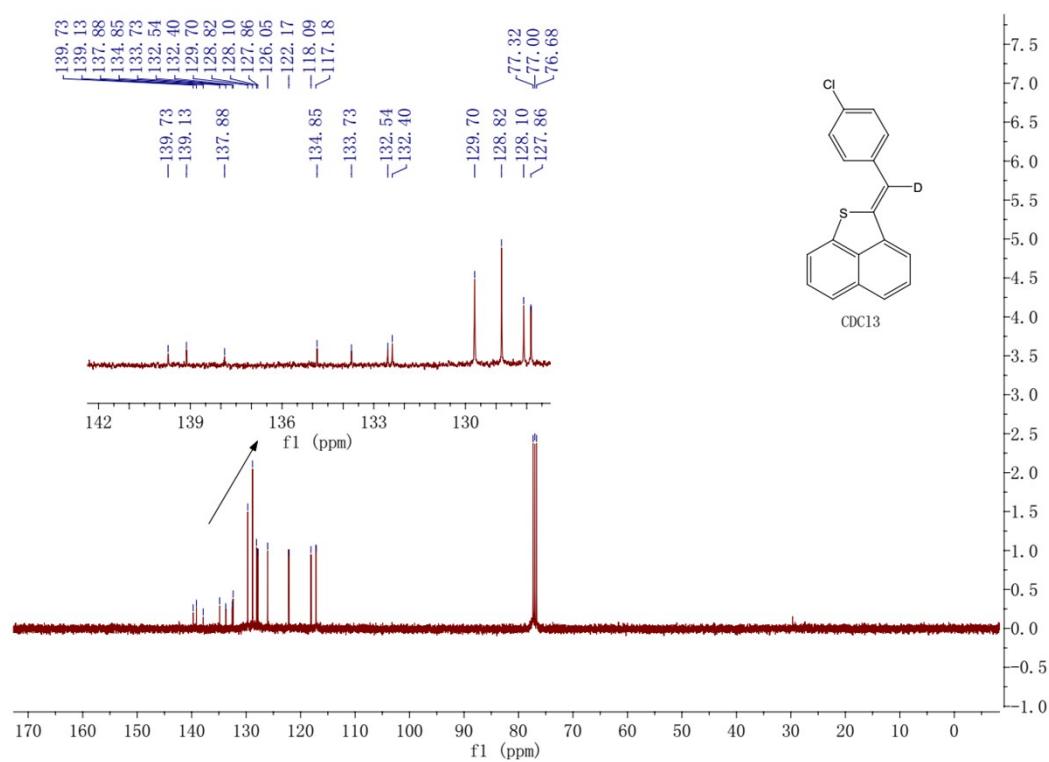



**(Z)-2-((3-fluorophenyl)methylene-d)-2H-naphtho[1,8-bc]thiophene (5c)**

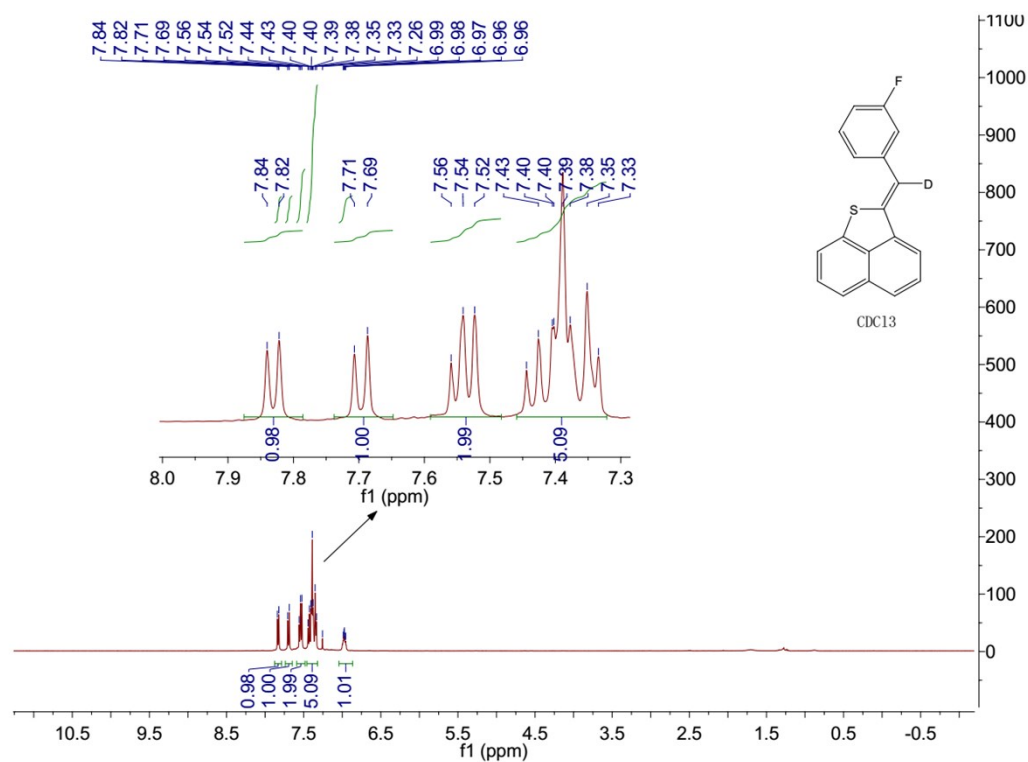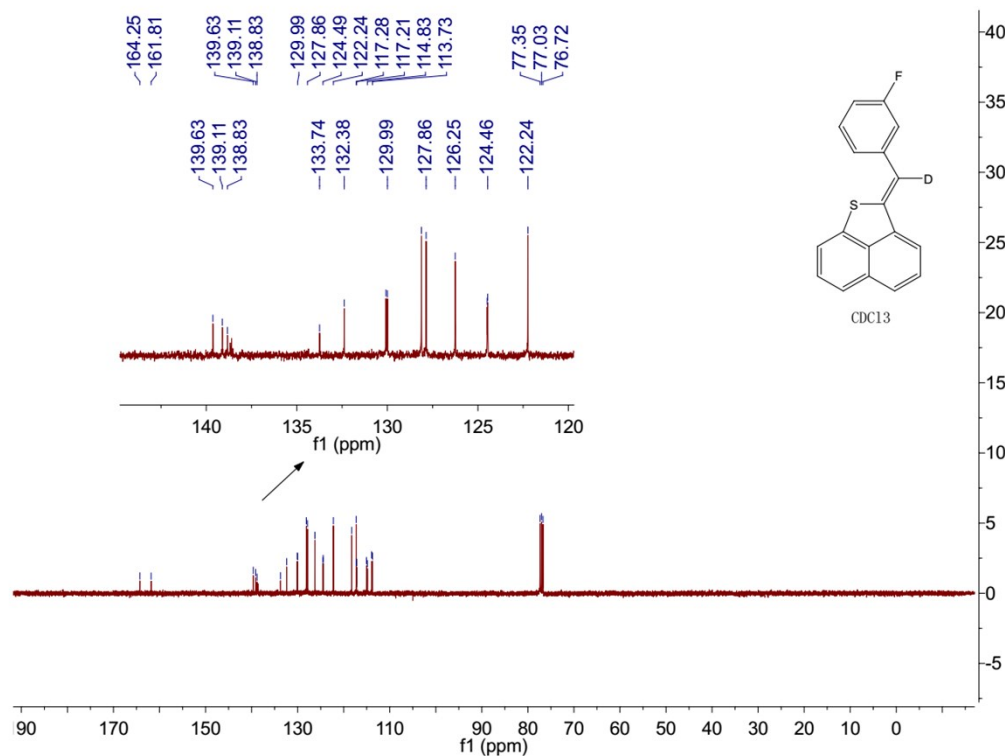

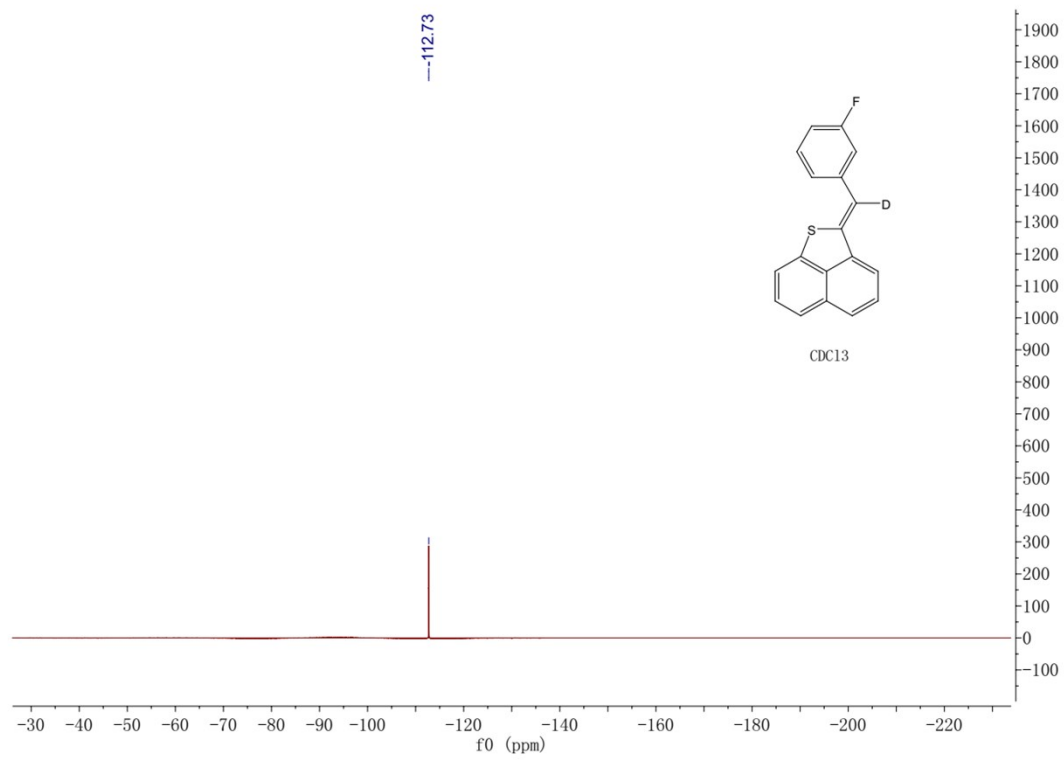

# 1-(Naphthalen-2-ylsulfonyl)benzo[*cd*]indol-2(1*H*)-one (6)

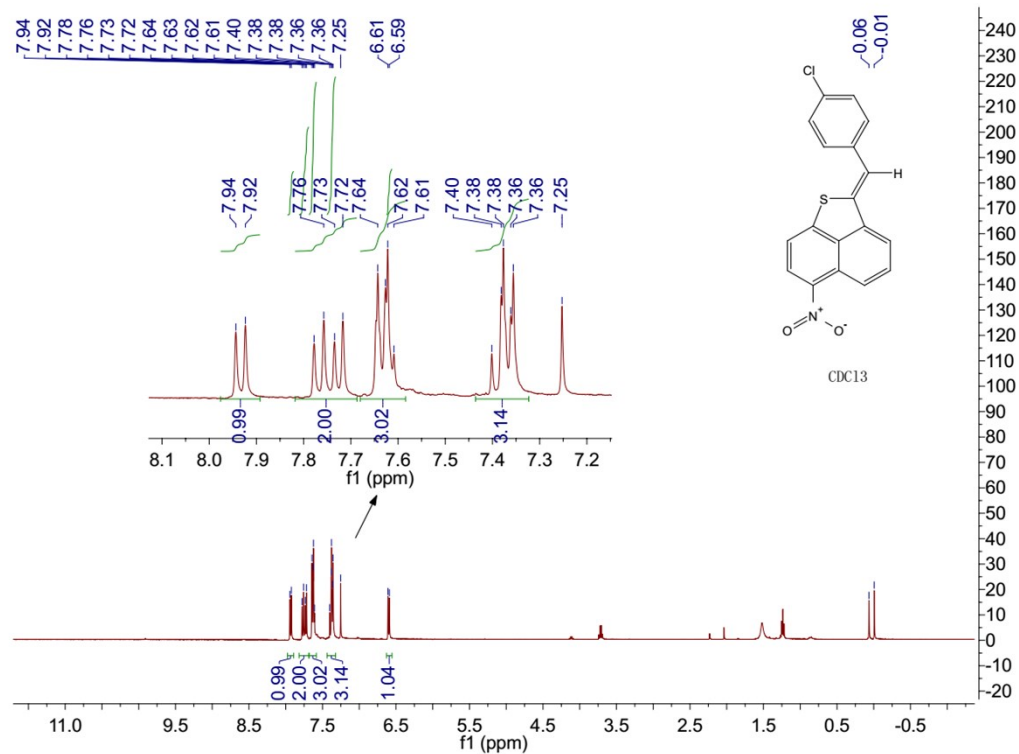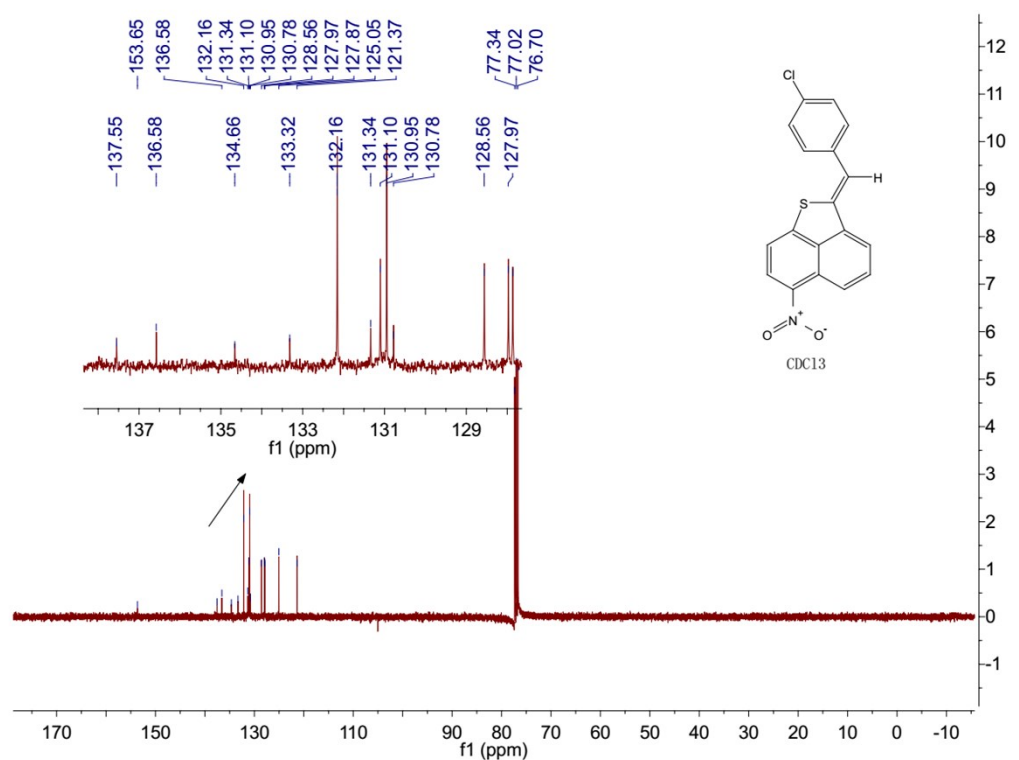

**S-(8-((4-chlorophenyl)ethynyl)naphthalen-1-yl) O-ethyl carbonodithioate**

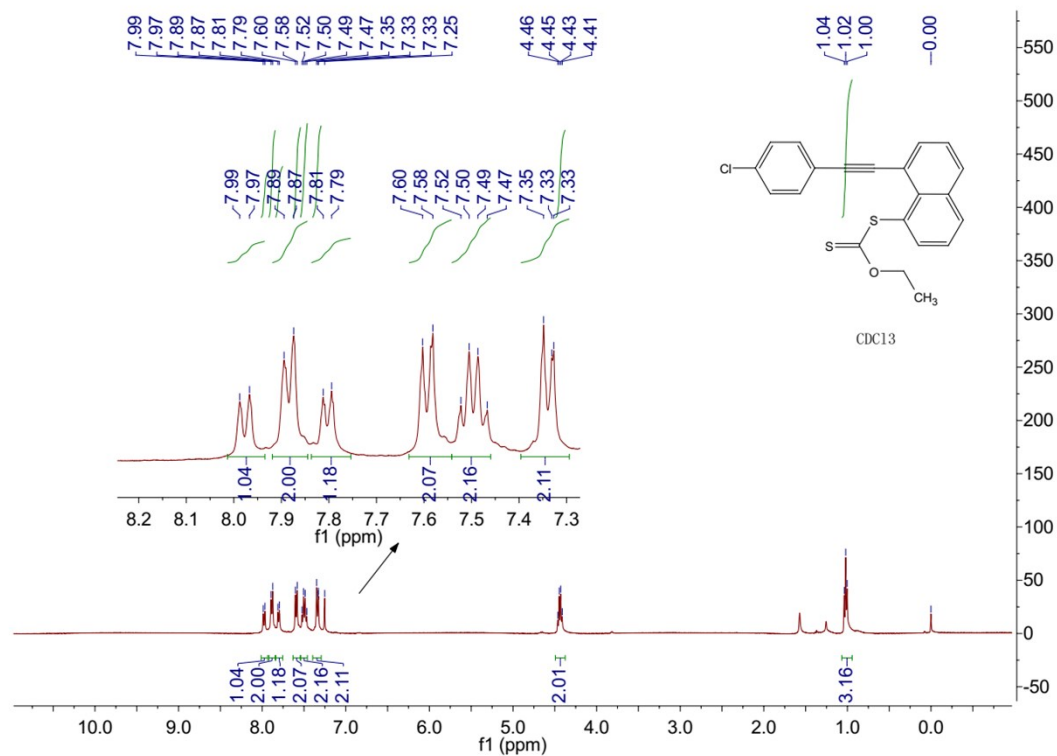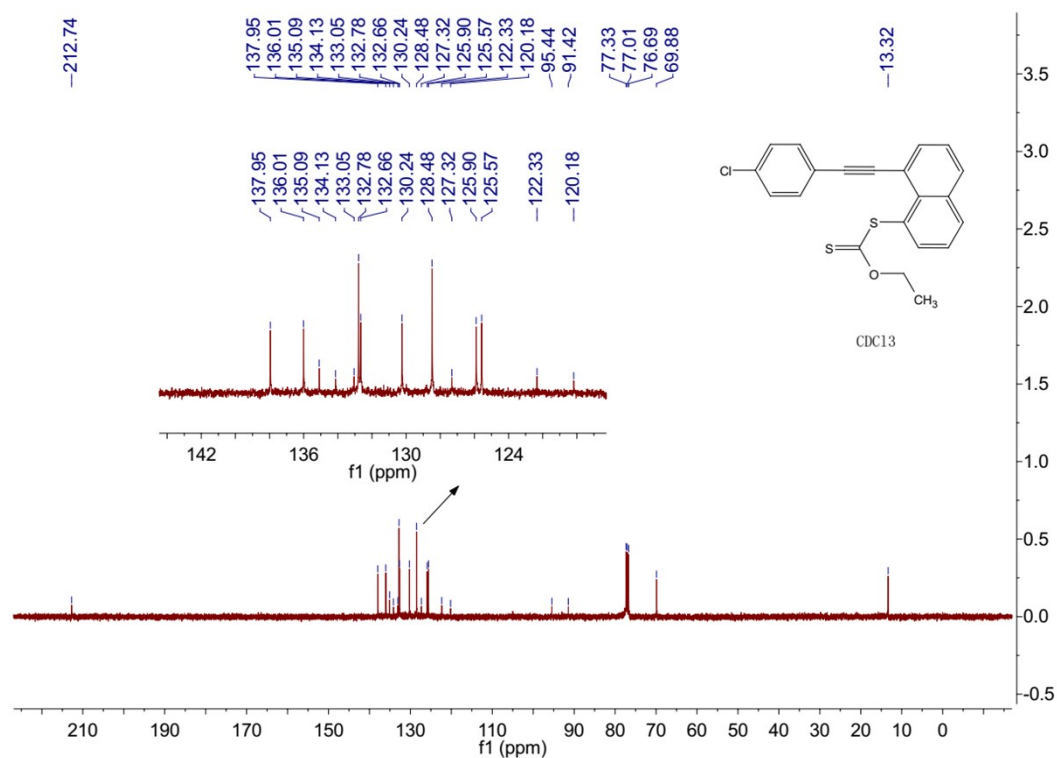

Supplement: d0ob02233k1.pdf [file d0ob02233k1.pdf]
